# Supplementary material for: Preparation of octahydro- and tetrahydro-[1,10]phenanthroline zirconium and hafnium complexes for olefin polymerization
Source: Royal Society of Chemistry journal article supplement (doi:10.1039/c4dt03683b), 2015-01-01

## Supporting Information

# Preparation of octahydro- and tetrahydro- [1,10]phenanthroline zirconium and hafnium complexes for olefin polymerization

*Eun Yeong Hwang,<sup>a</sup> Geun Ho Park,<sup>a</sup> Chun Sun Lee,<sup>a</sup> Yi Young Kang,<sup>b</sup> Junseong Lee,<sup>b</sup> and*

*Bun Yeoul Lee<sup>a\*</sup>*

<sup>a</sup>Department of Molecular Science and Technology, Ajou University, Suwon 443-749, South Korea; <sup>b</sup>Department of Chemistry, Chonnam National University, 77 Yongbong-ro, Buk-gu, Gwangju 500-757, Korea; Email: bunyeoul@ajou.ac.kr; Tel: 82-31-219-1844

$^1\text{H}$  NMR spectrum of **4** in  $\text{C}_6\text{D}_6$

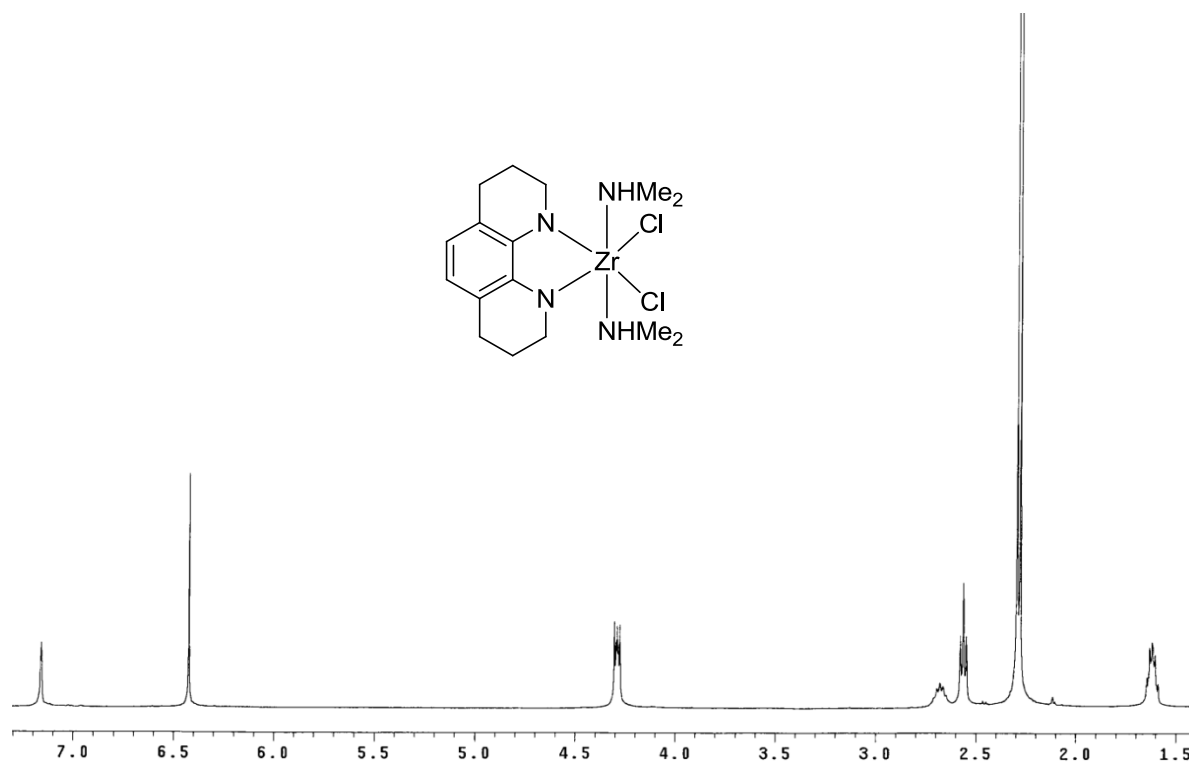

$^{13}\text{C}$  NMR spectrum of **4** in  $\text{C}_6\text{D}_6$

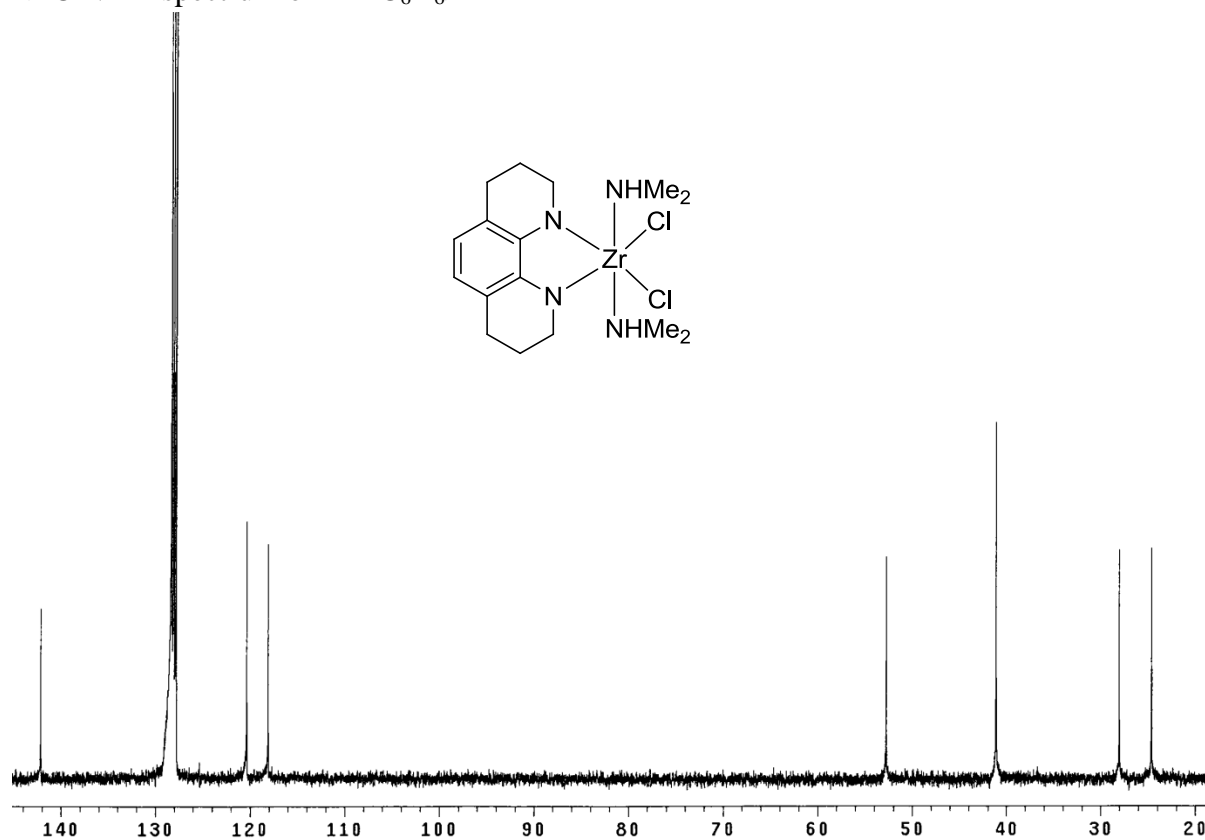

$^1\text{H}$  NMR spectrum of **5** in  $\text{C}_6\text{D}_6$

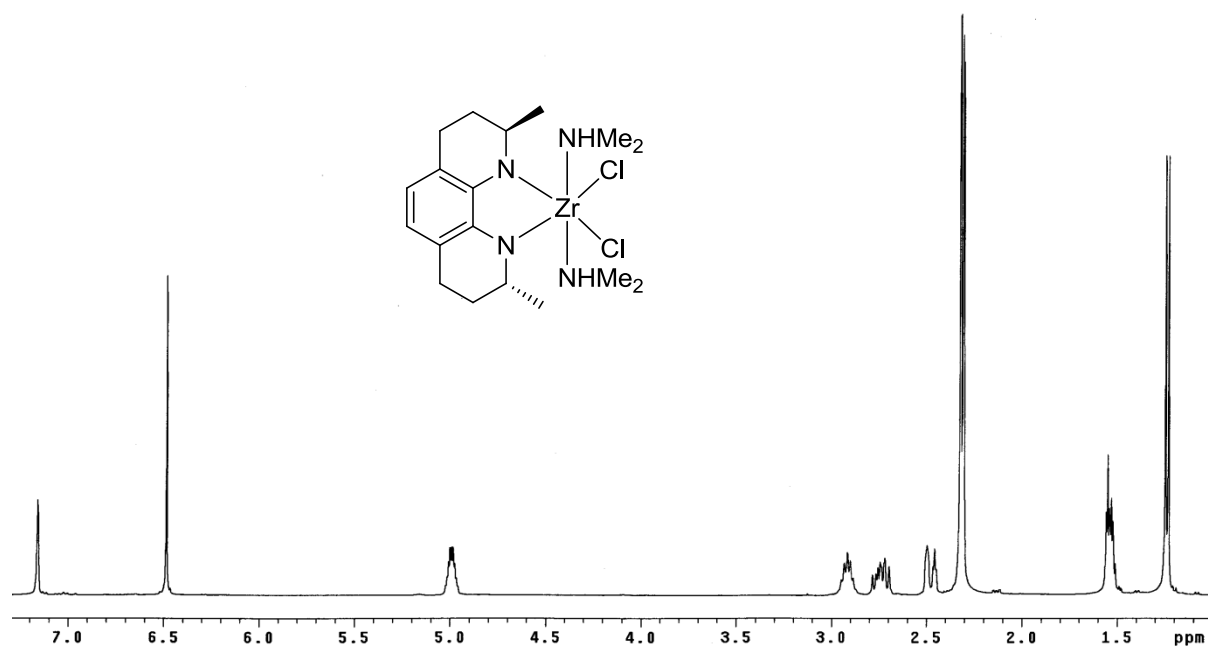

$^{13}\text{C}$  NMR spectrum of **5** in  $\text{C}_6\text{D}_6$

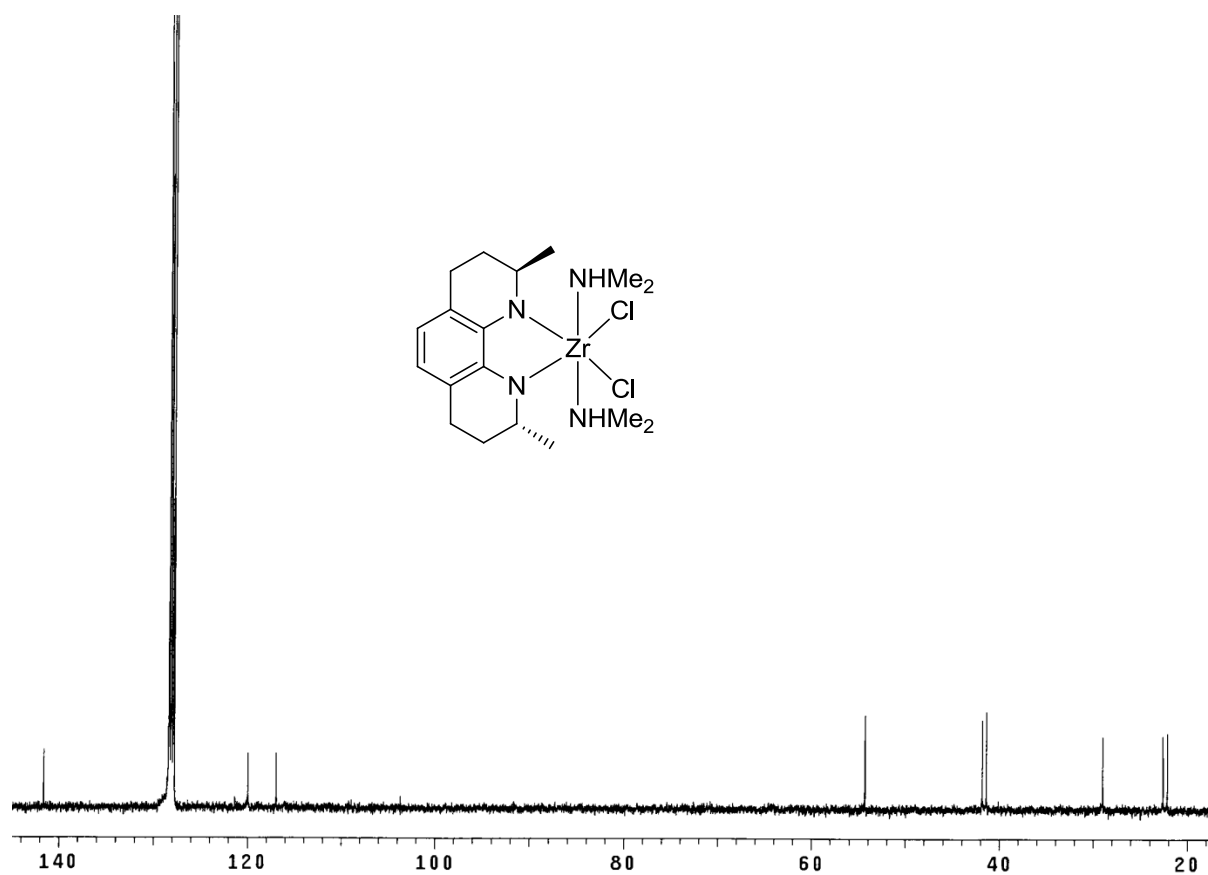

$^1\text{H}$  NMR spectrum of **6** in  $\text{C}_6\text{D}_6$

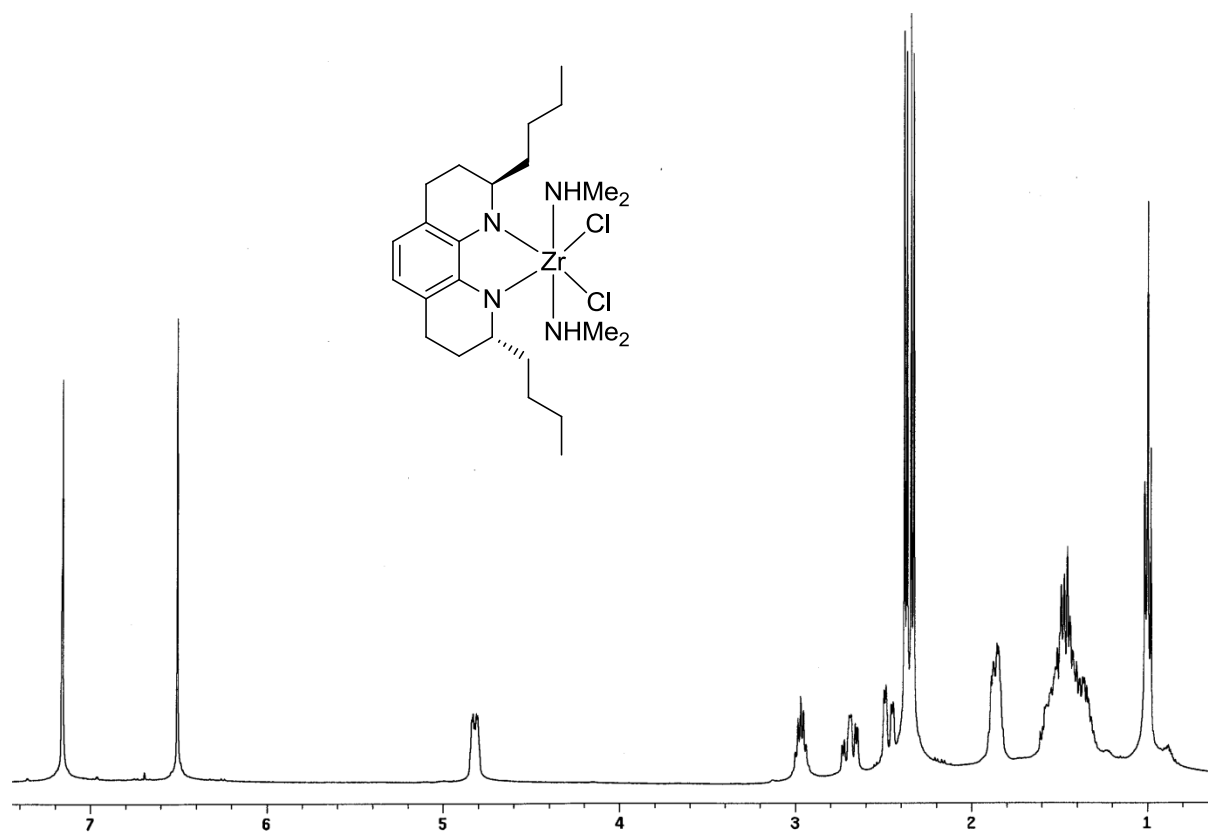

$^{13}\text{C}$  NMR spectrum of **6** in  $\text{C}_6\text{D}_6$

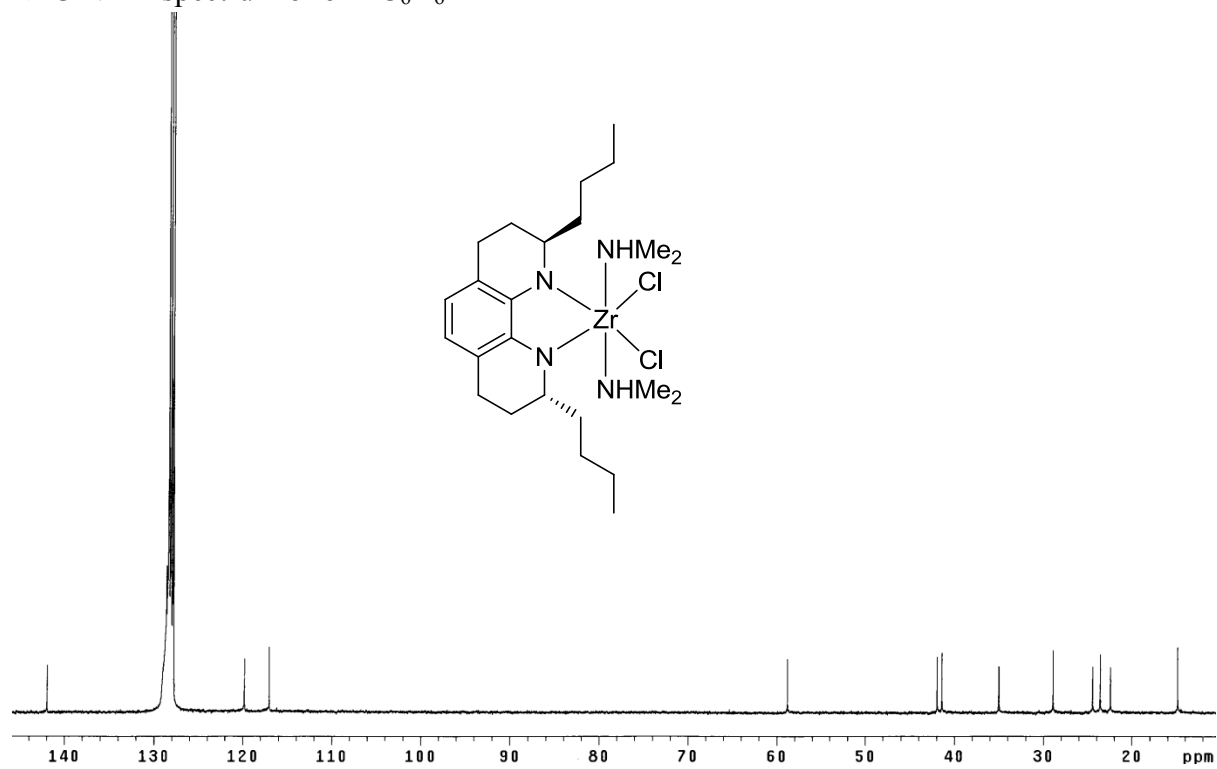

$^1\text{H}$  NMR spectrum of **7** in  $\text{C}_6\text{D}_6$

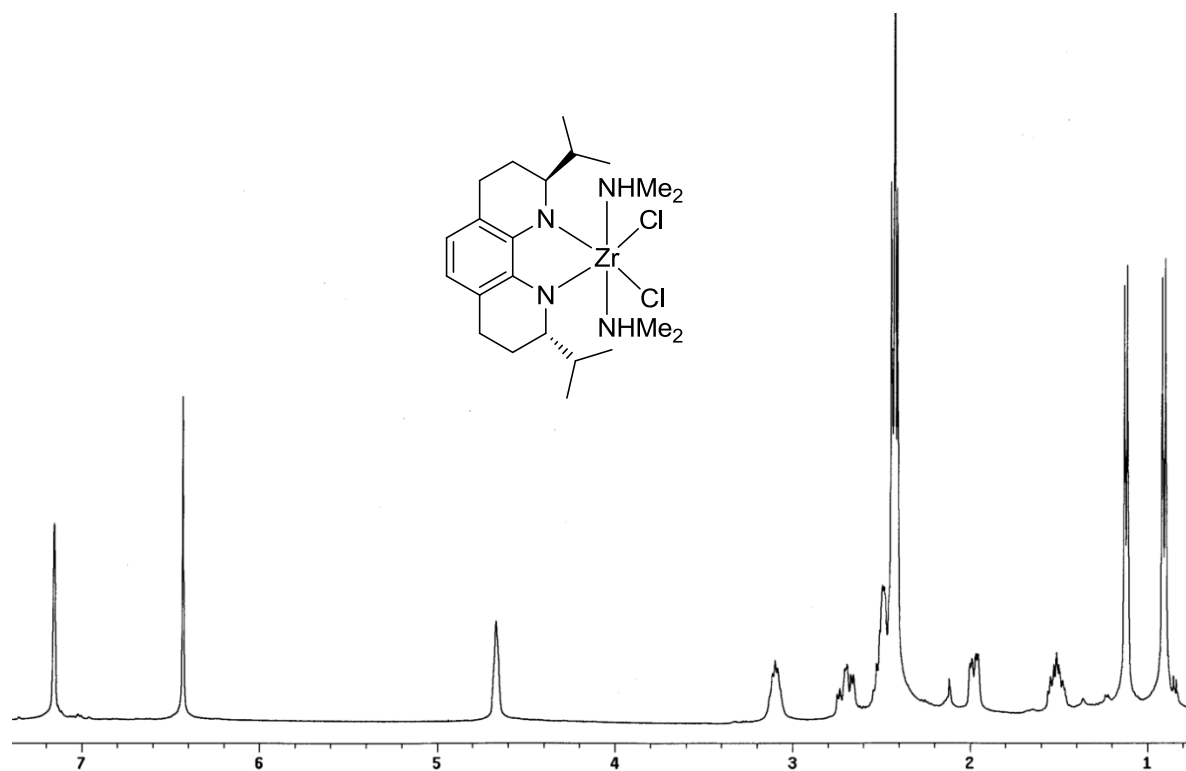

$^{13}\text{C}$  NMR spectrum of **7** in  $\text{C}_6\text{D}_6$

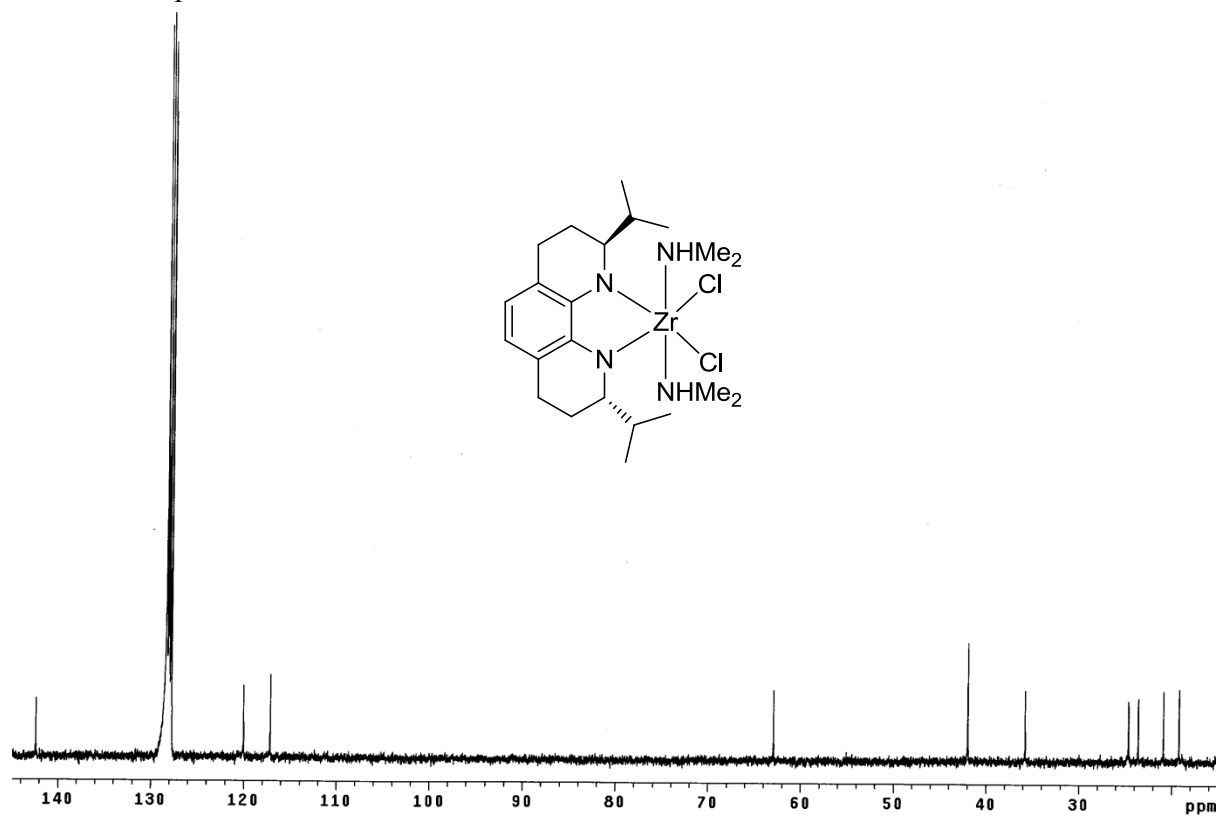

Chemical structure of the complex is shown above the spectrum. The complex consists of a hafnium (Hf) center coordinated by two dimethylamino groups (NHMe<sub>2</sub>) and two chlorine atoms (Cl). The hafnium center is also coordinated by a ligand derived from a 1,2,3,4-tetrahydronaphthalene derivative, which is shown as a fused ring system with two nitrogen atoms (N) coordinated to the hafnium center.

Chemical structure of the complex is shown above the spectrum. The complex consists of a hafnium (Hf) center coordinated by two dimethylamino groups (NHMe<sub>2</sub>) and two chlorine atoms (Cl). The hafnium center is also coordinated by a ligand derived from a 1,2,3,4-tetrahydronaphthalene derivative, which is shown as a fused ring system with two nitrogen atoms (N) coordinated to the hafnium center.

[illegible]

$^1\text{H}$  NMR spectrum of **9** in  $\text{C}_6\text{D}_6$

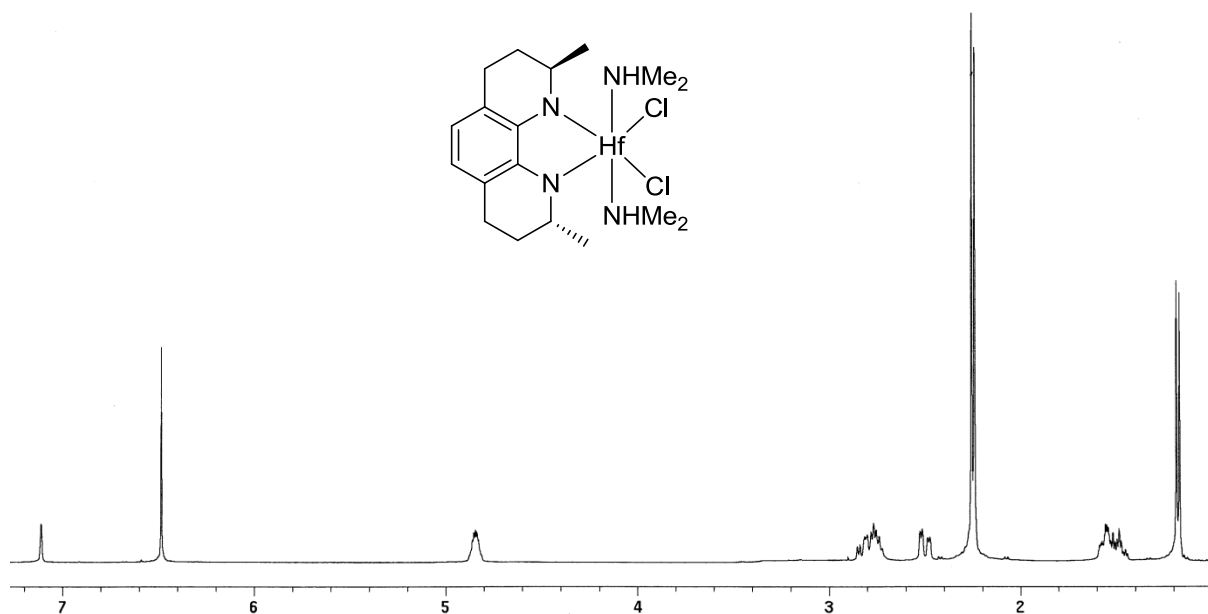

$^{13}\text{C}$  NMR spectrum of **9** in  $\text{C}_6\text{D}_6$

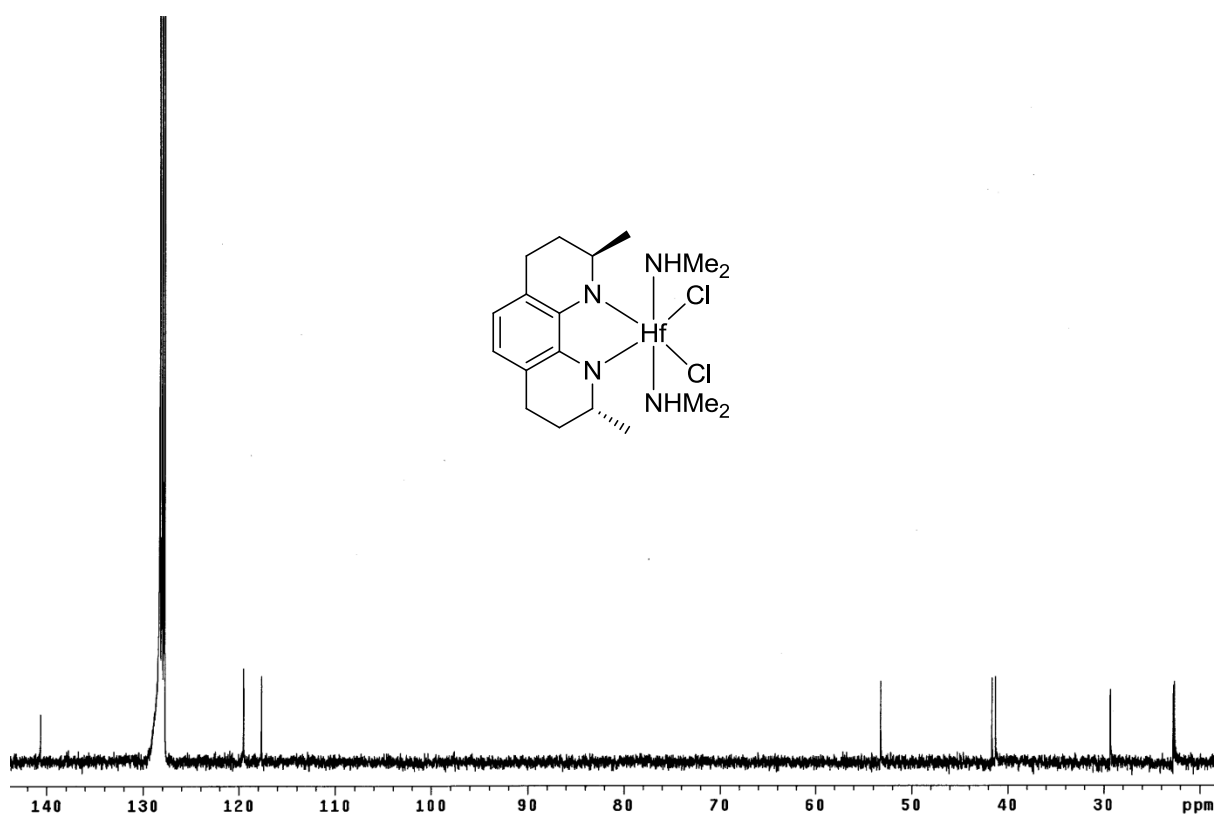

$^1\text{H}$  NMR spectrum of **10** in  $\text{C}_6\text{D}_6$

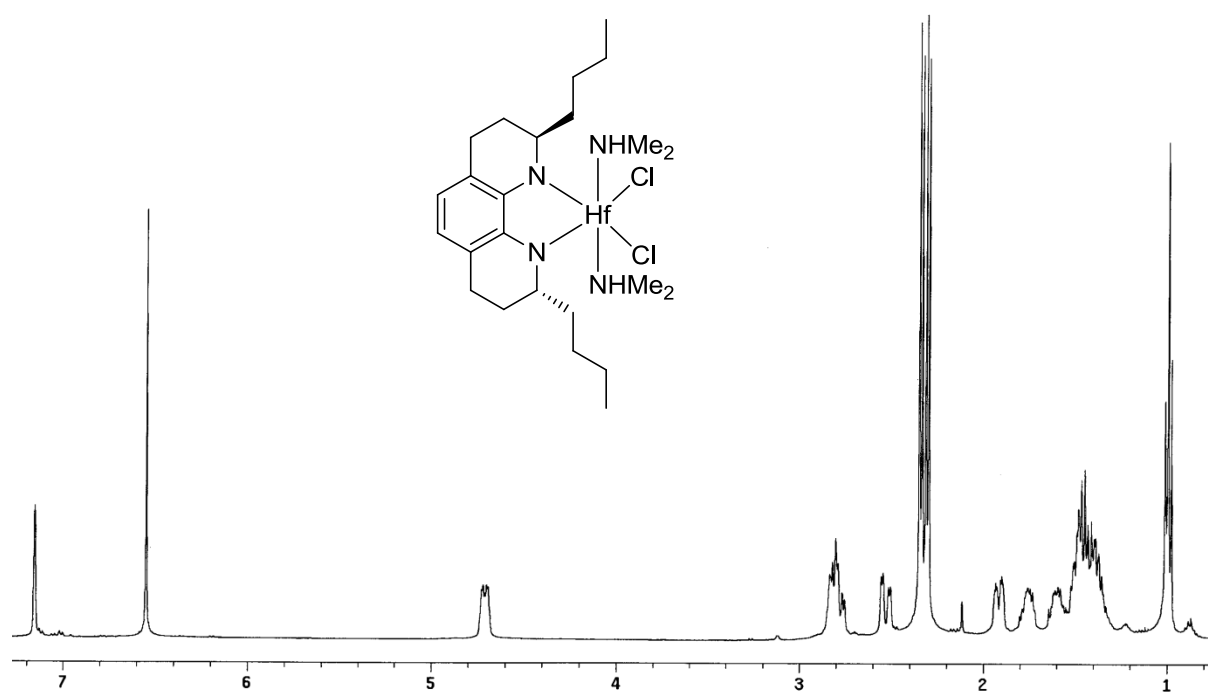

$^{13}\text{C}$  NMR spectrum of **10** in  $\text{C}_6\text{D}_6$

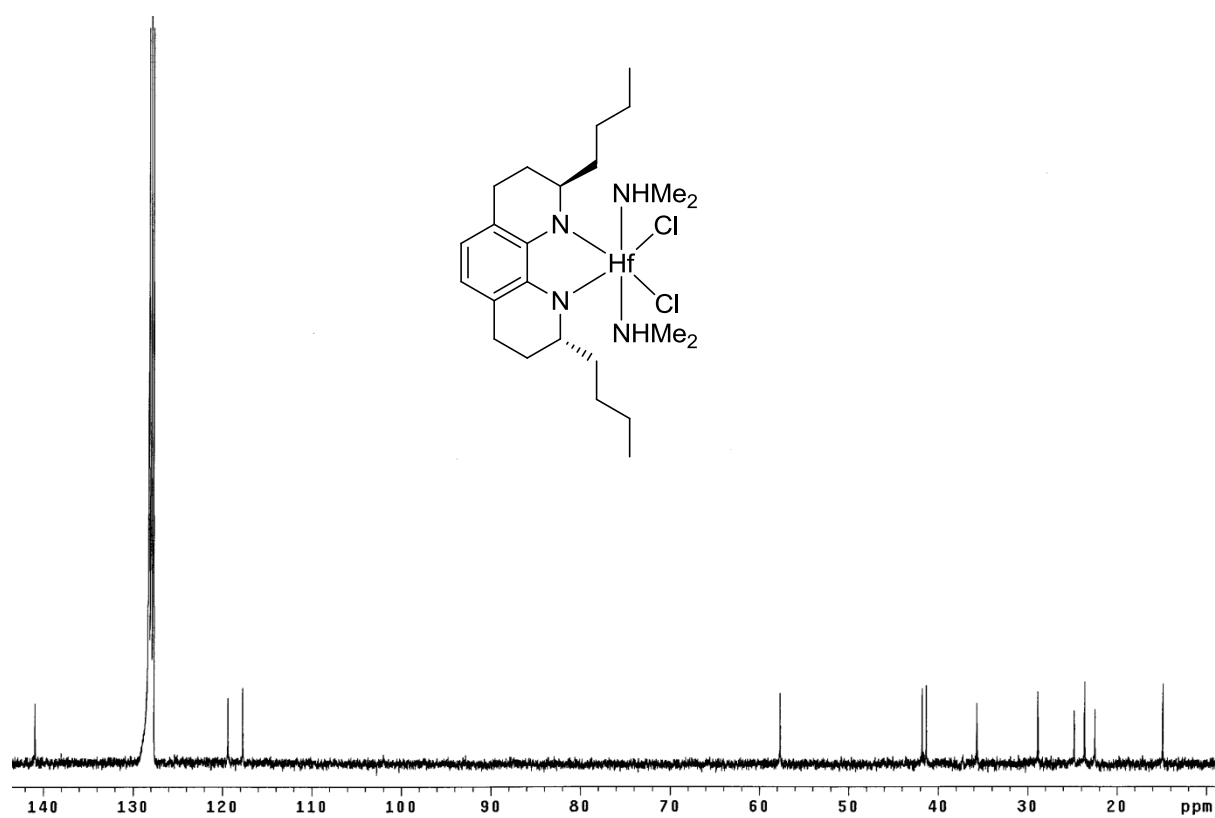



$^1\text{H}$  NMR spectrum of **11** in  $\text{C}_6\text{D}_6$

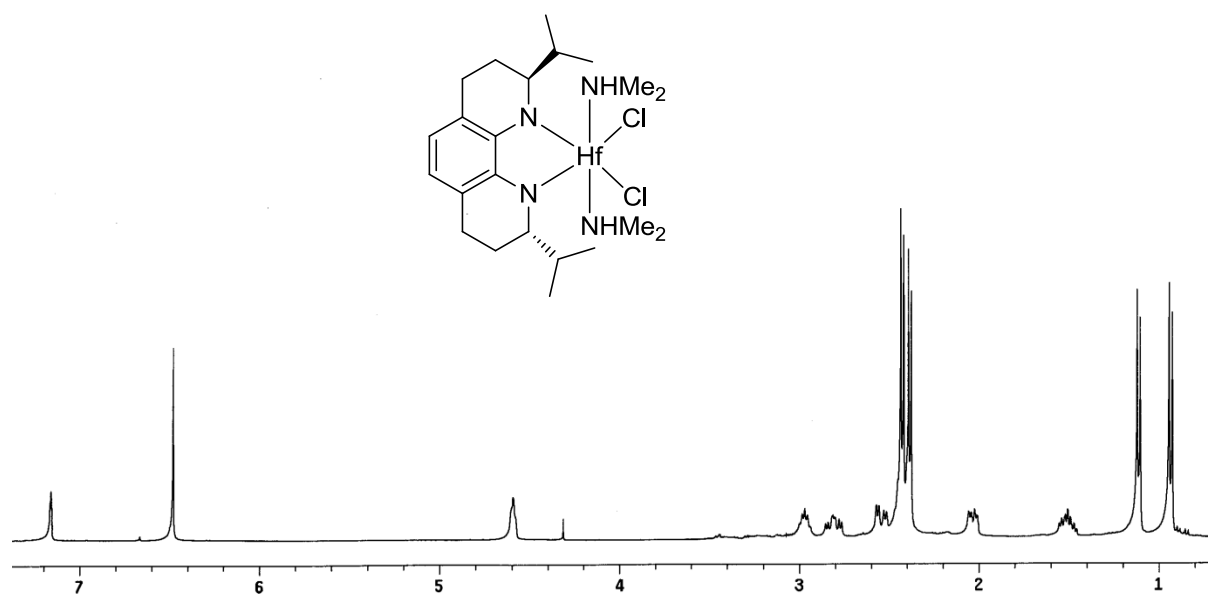

$^{13}\text{C}$  NMR spectrum of **11** in  $\text{C}_6\text{D}_6$

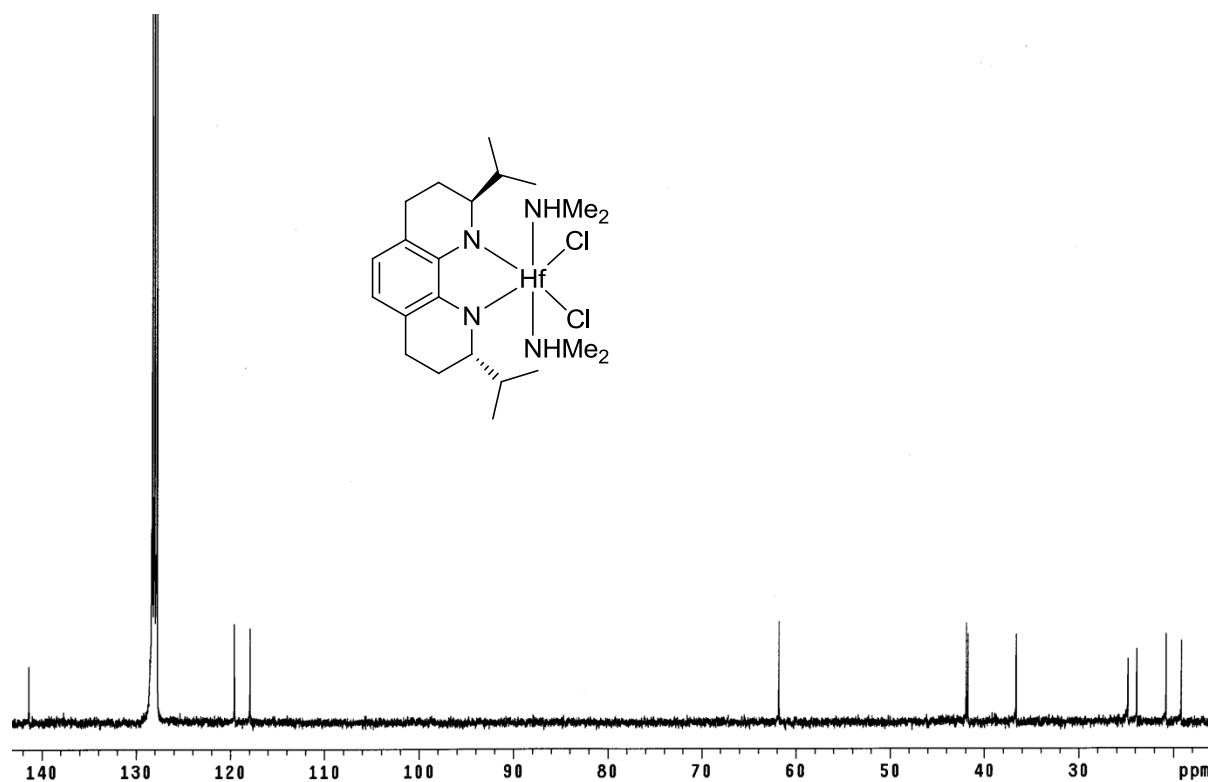

$^1\text{H}$  NMR spectrum of **12** in  $\text{C}_6\text{D}_6$

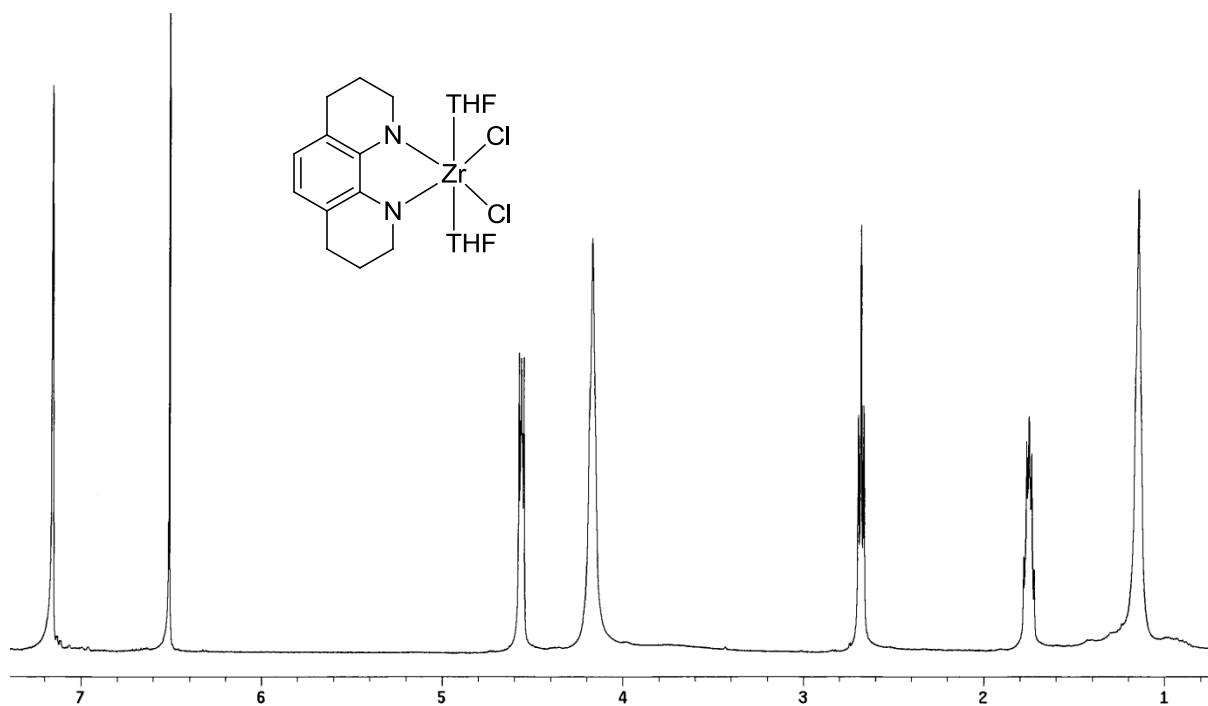

$^{13}\text{C}$  NMR spectrum of **12** in  $\text{C}_6\text{D}_6$

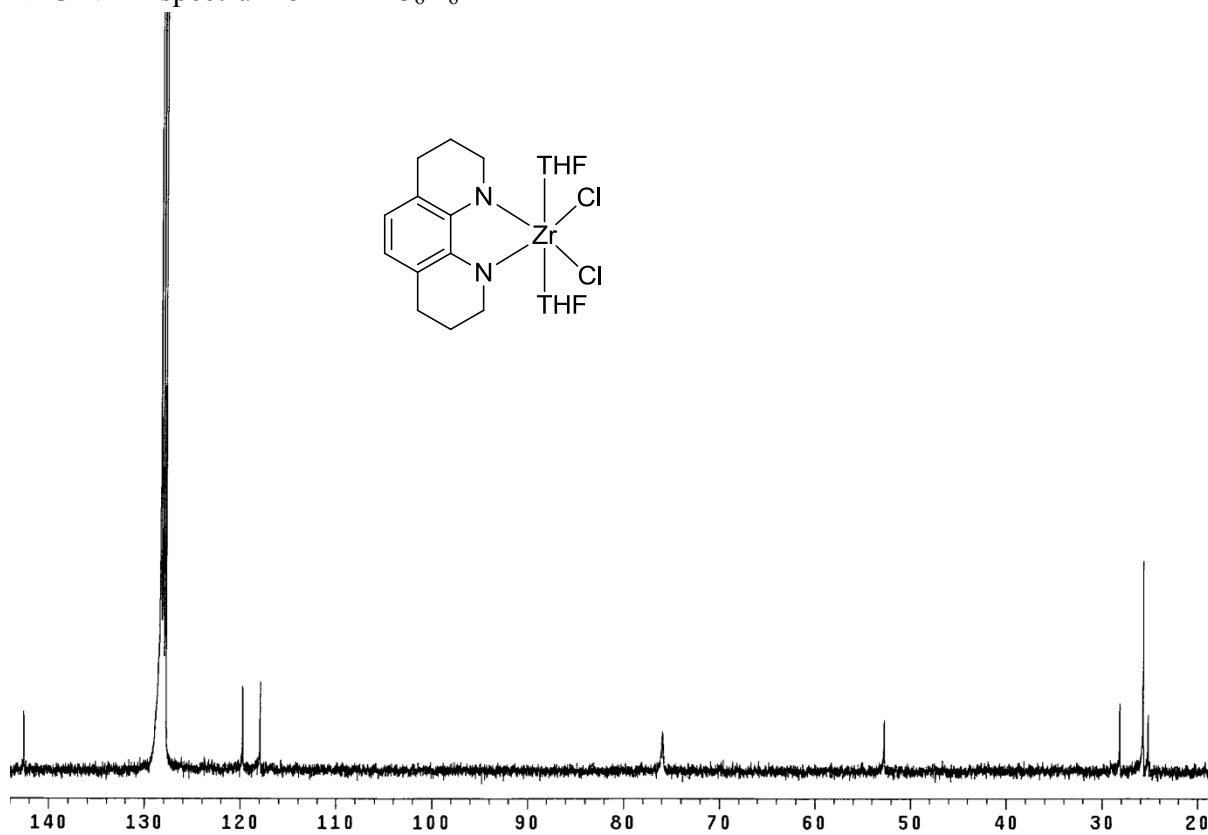

$^1\text{H}$  NMR spectrum of **13** in  $\text{C}_6\text{D}_6$

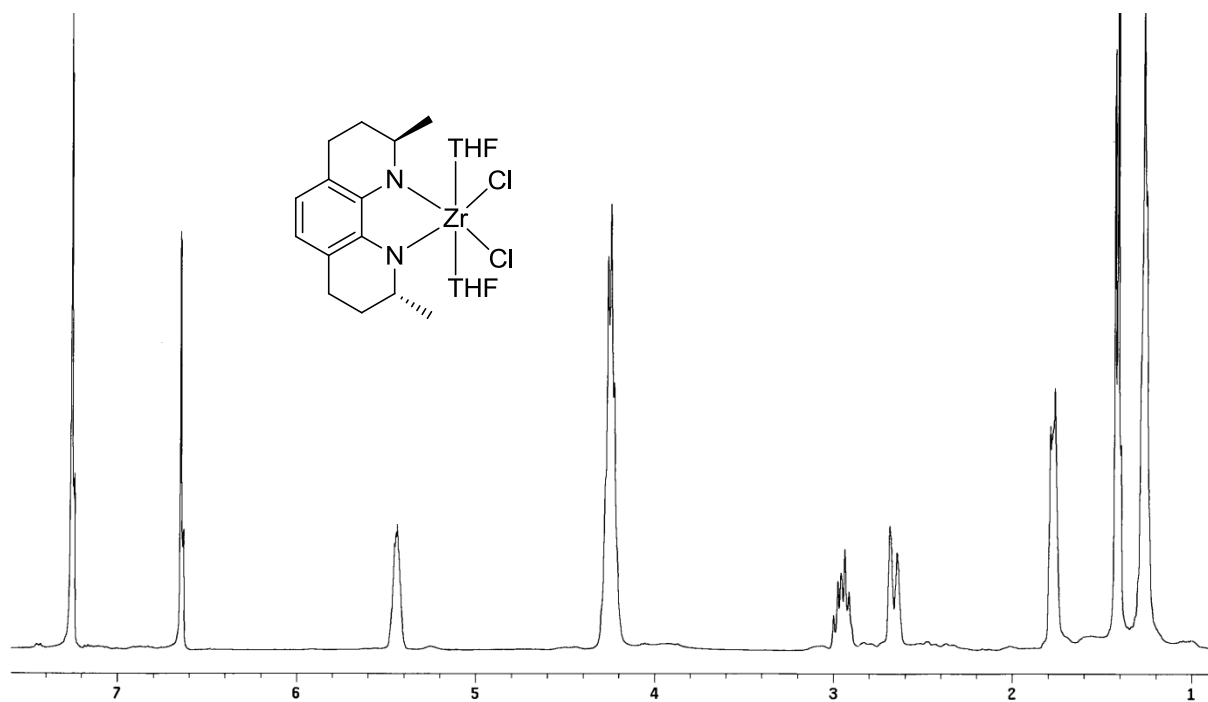

$^{13}\text{C}$  NMR spectrum of **13** in  $\text{C}_6\text{D}_6$

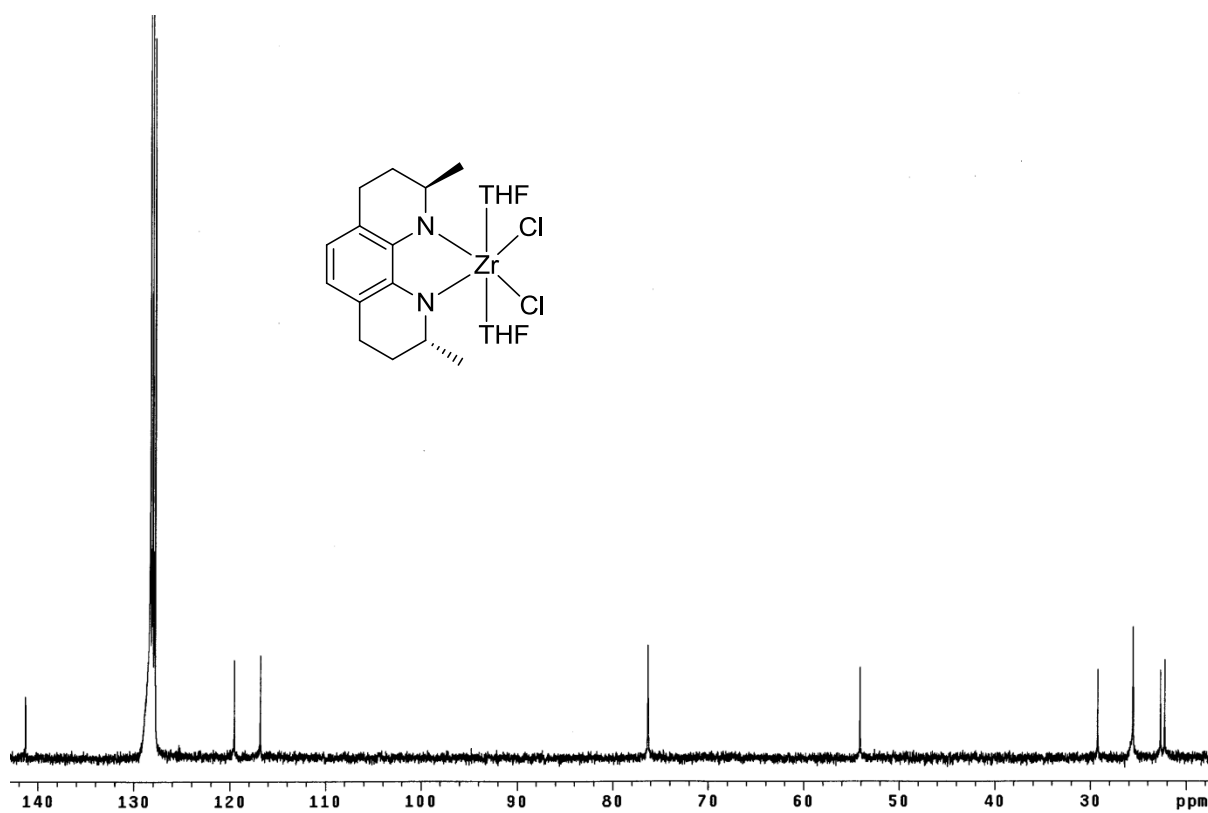

$^1\text{H}$  NMR spectrum of **14** in  $\text{C}_6\text{D}_6$

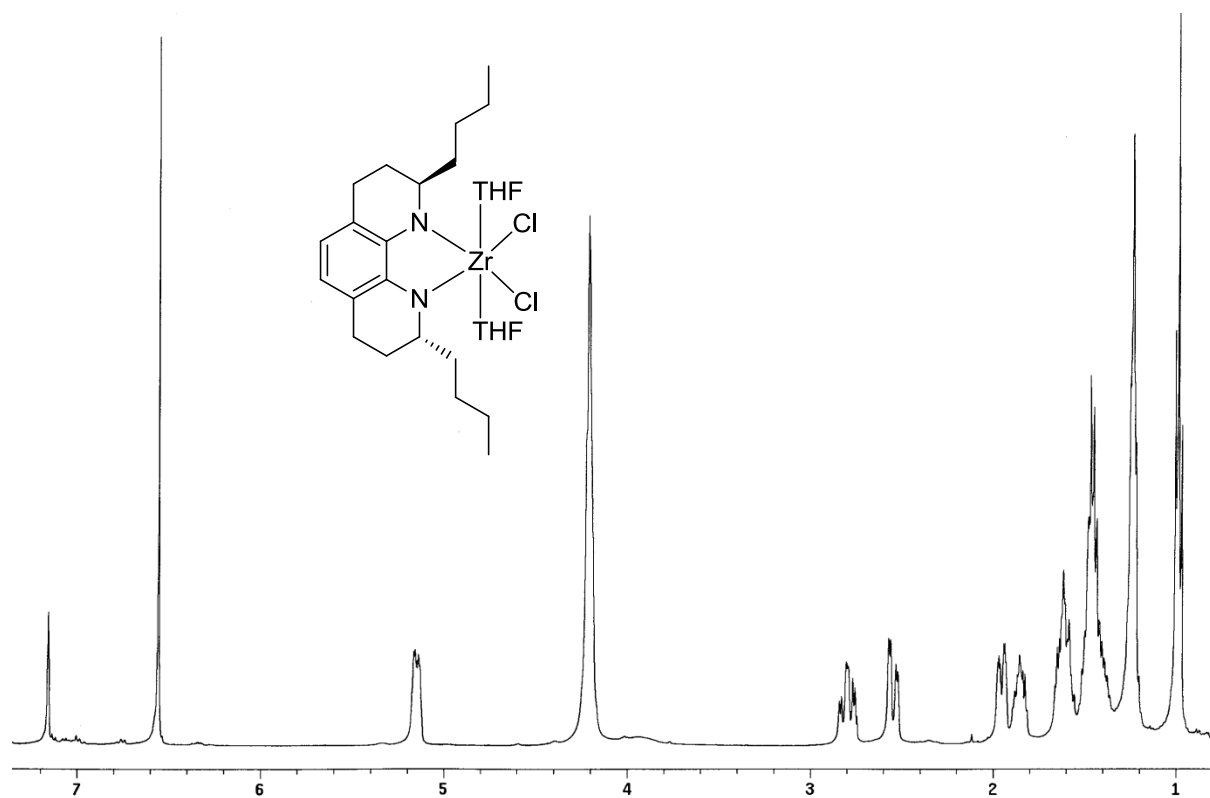

$^{13}\text{C}$  NMR spectrum of **14** in  $\text{C}_6\text{D}_6$

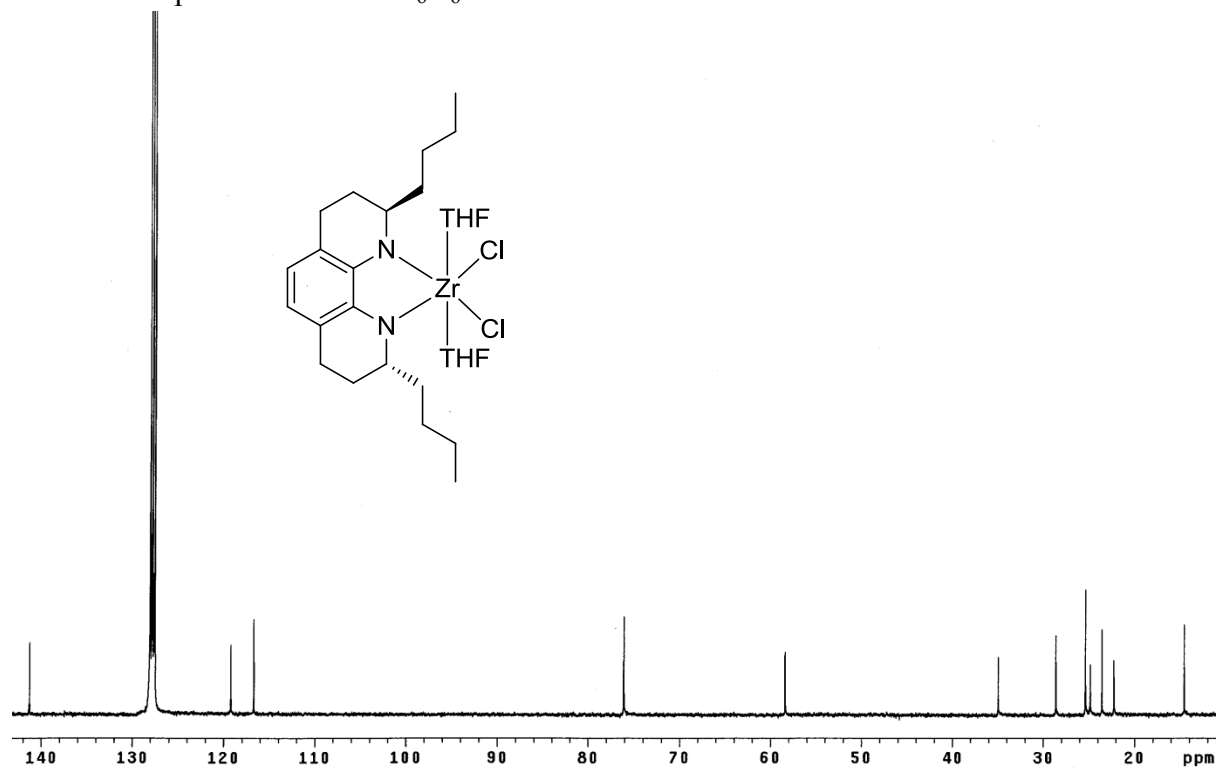

$^1\text{H}$  NMR spectrum of **15** in  $\text{C}_6\text{D}_6$

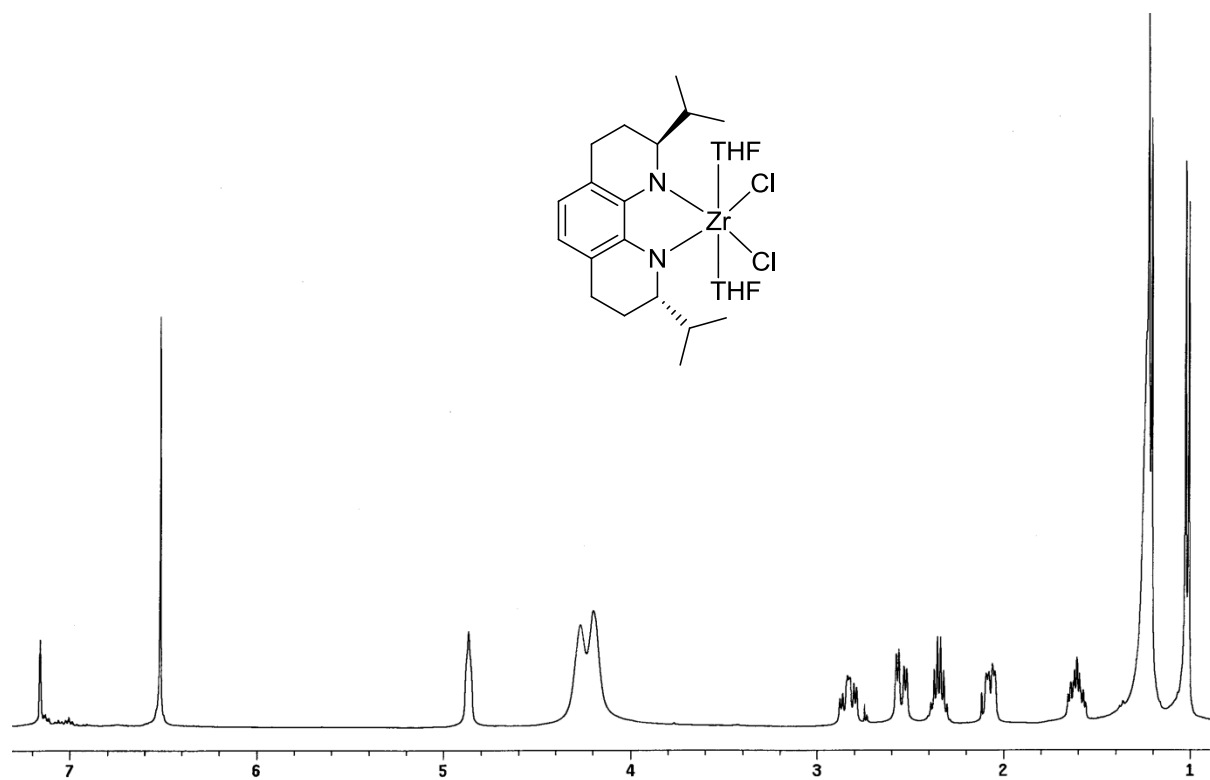

$^{13}\text{C}$  NMR spectrum of **15** in  $\text{C}_6\text{D}_6$

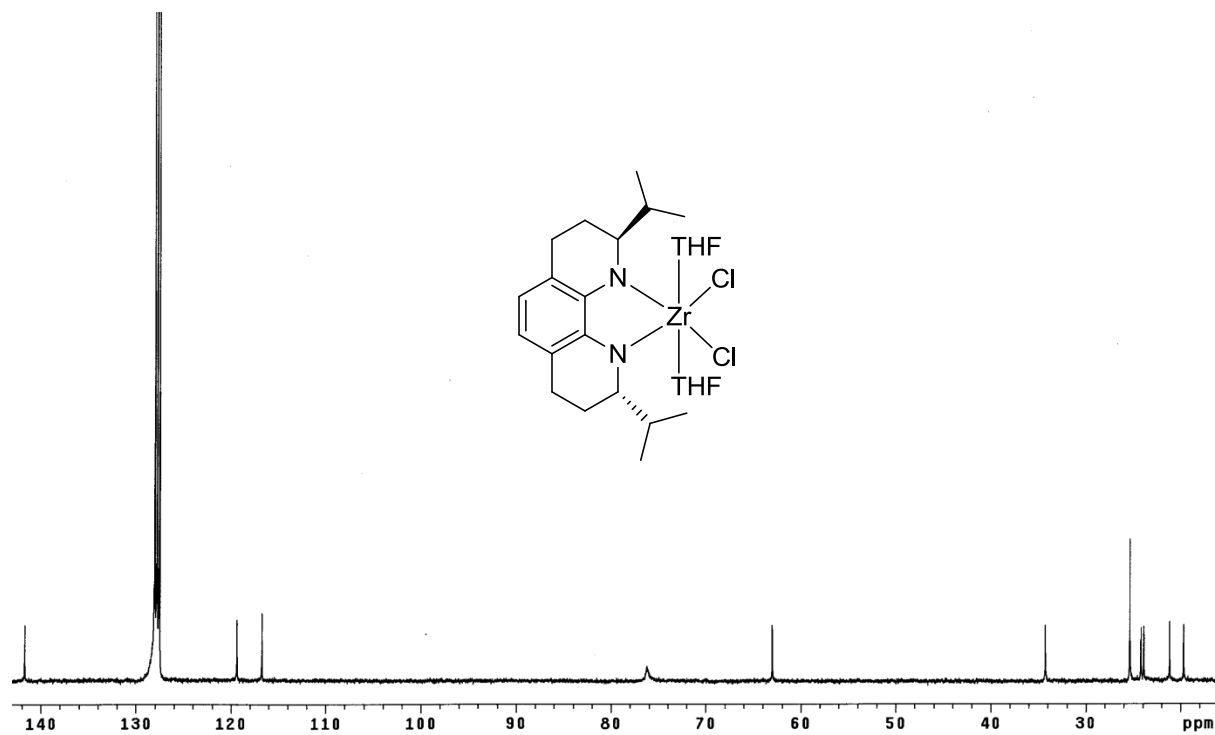

$^1\text{H}$  NMR spectrum of **16** in  $\text{C}_6\text{D}_6$

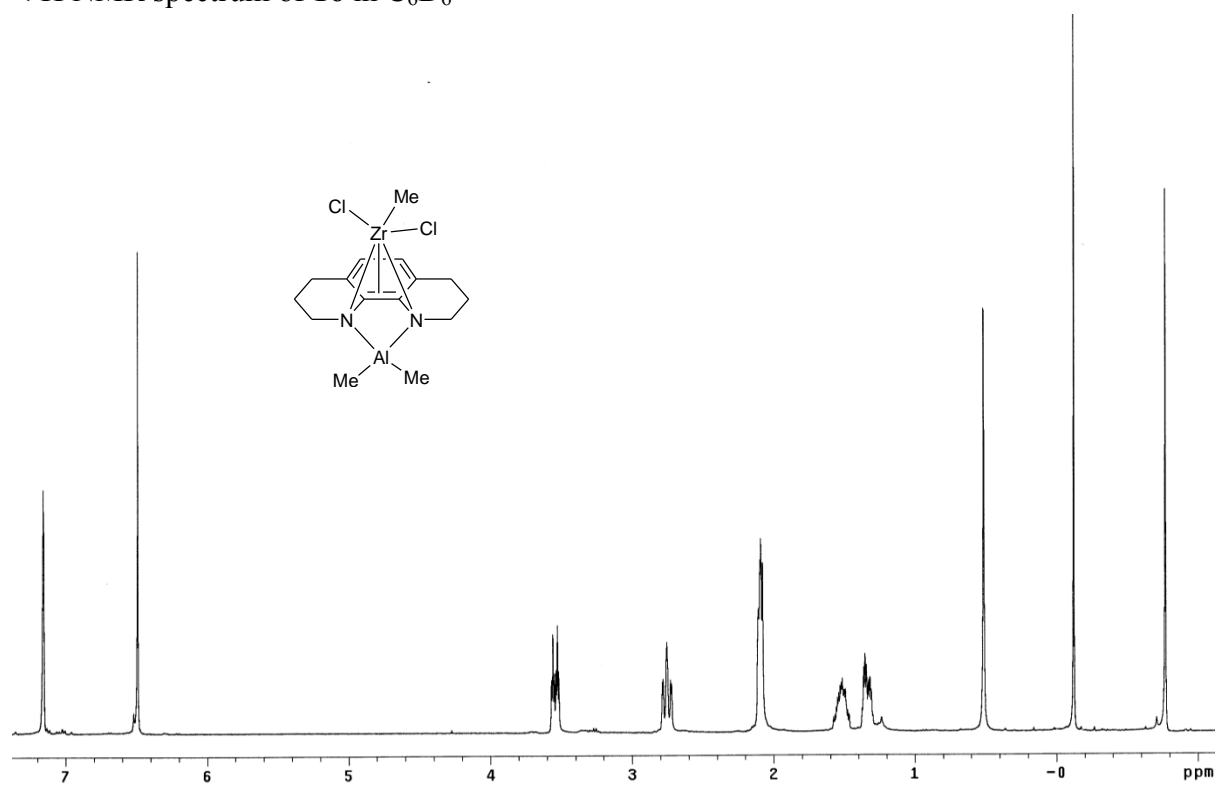

$^1\text{H}$  NMR spectrum of **16** in  $\text{C}_6\text{D}_6$  after heating at 80 °C for 3 hours

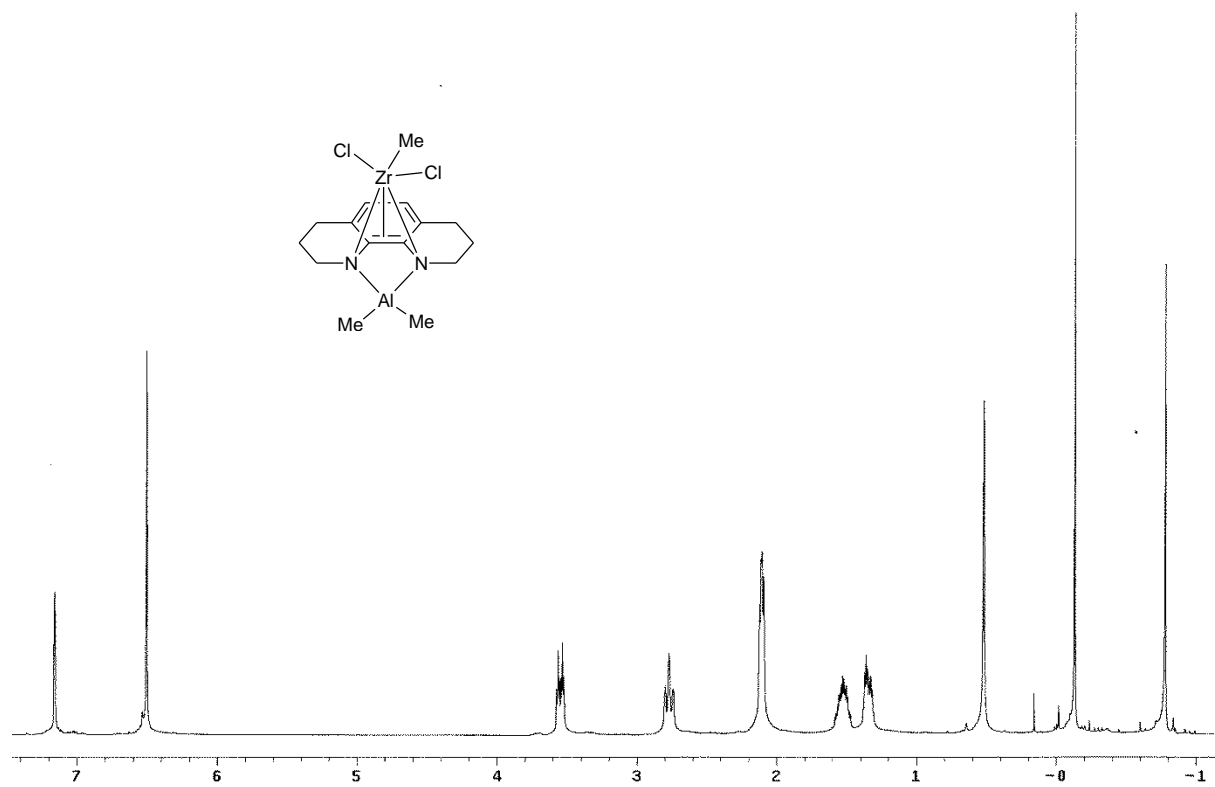

< $^1\text{H}$  NMR spectrum of **16** in  $\text{THF-d}_8$ : The spectrum showed that **16** reconverted to **12** in  $\text{THF}$ .>

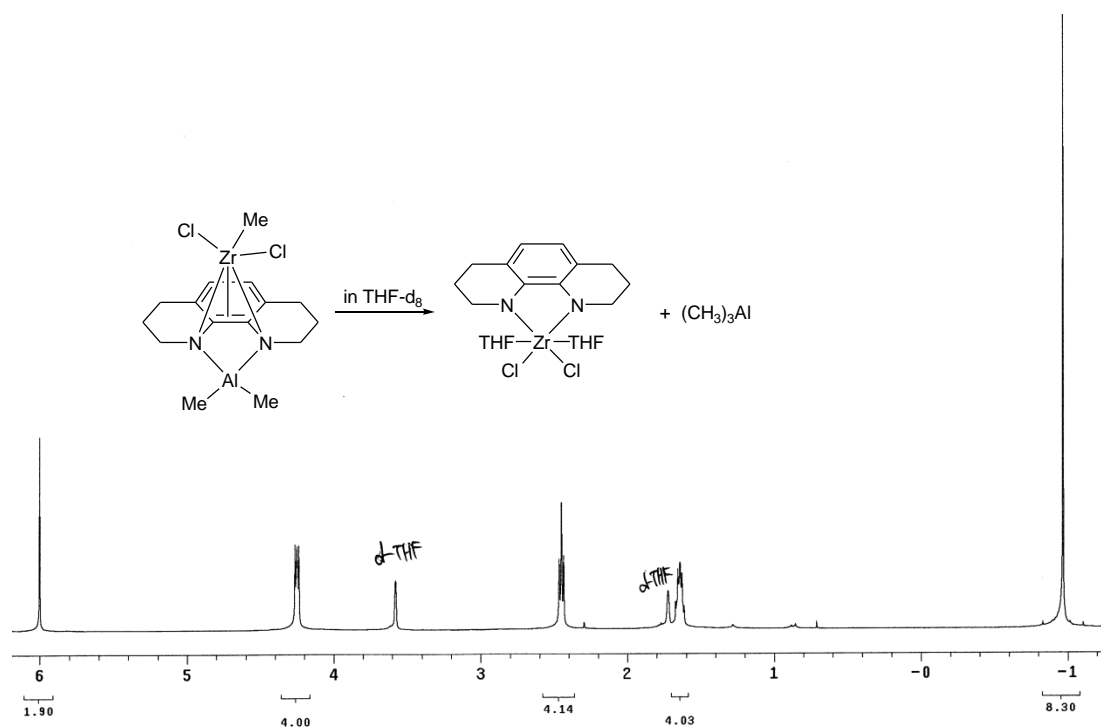

< $^1\text{H}$ - $^1\text{H}$  COSY NMR spectrum of **16** and signal assignment>

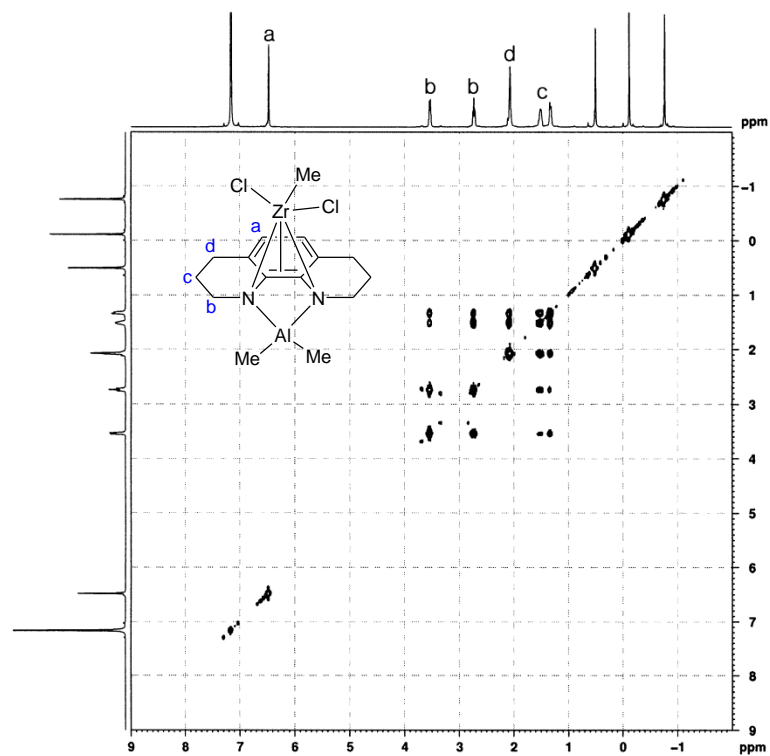

The figure displays a  $^{13}\text{C}$  NMR spectrum of a zirconium complex. The x-axis represents the chemical shift in ppm, ranging from 0 to 130. The spectrum shows a large, sharp peak at approximately 130 ppm, a smaller peak at approximately 125 ppm, and several smaller peaks in the aliphatic region between 20 and 40 ppm. An inset shows the chemical structure of the complex, which is a zirconium (Zr) complex coordinated by two chlorine (Cl) atoms and two methyl (Me) groups, and a ligand consisting of two nitrogen (N) atoms and two methyl (Me) groups, all coordinated to a central aluminum (Al) atom.



$^1\text{H}$  NMR spectrum of **17** in  $\text{C}_6\text{D}_6$

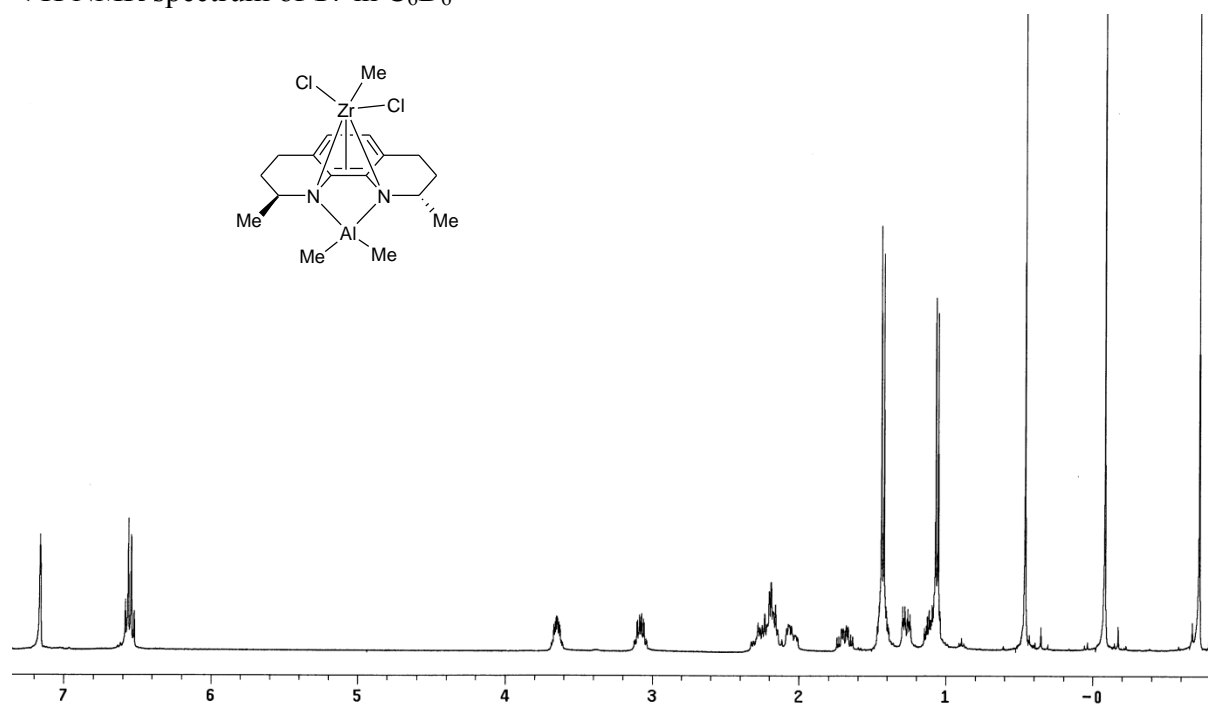

$^{13}\text{C}$  NMR Spectrum of **17** in  $\text{C}_6\text{D}_6$

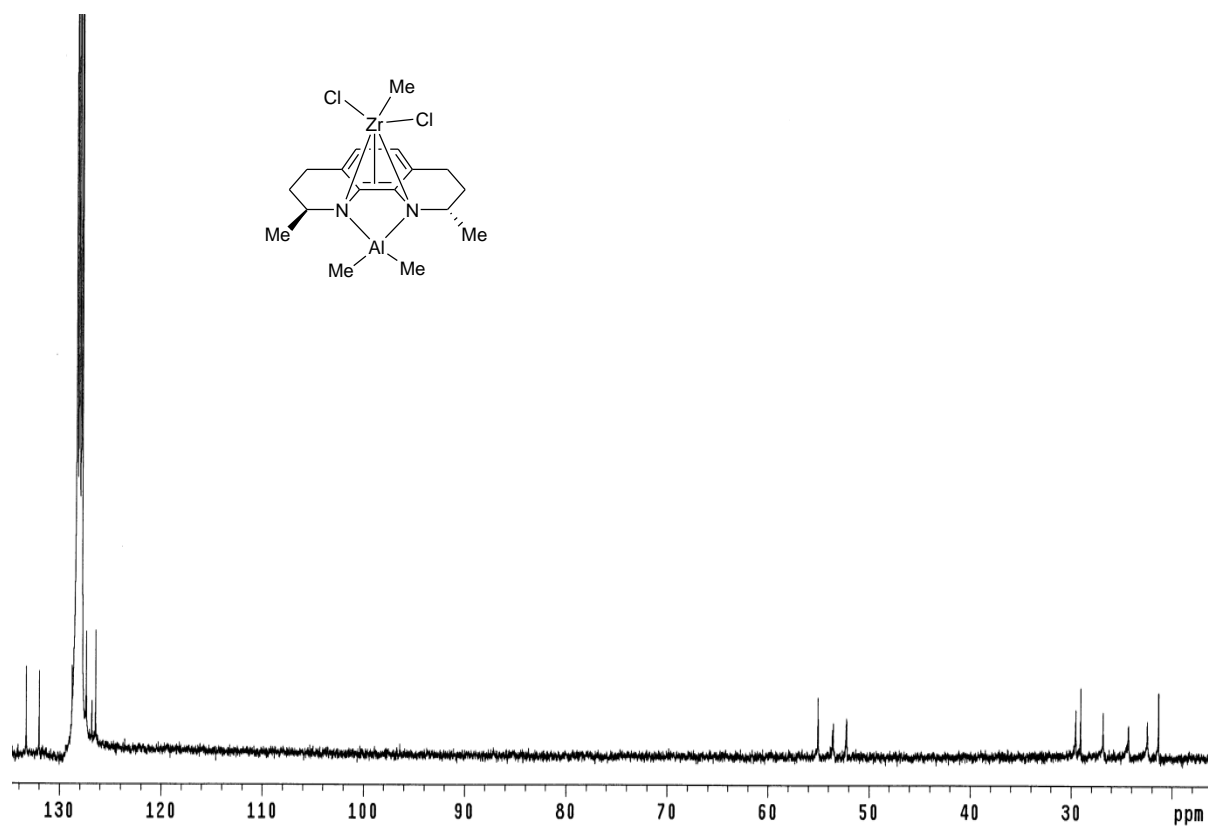

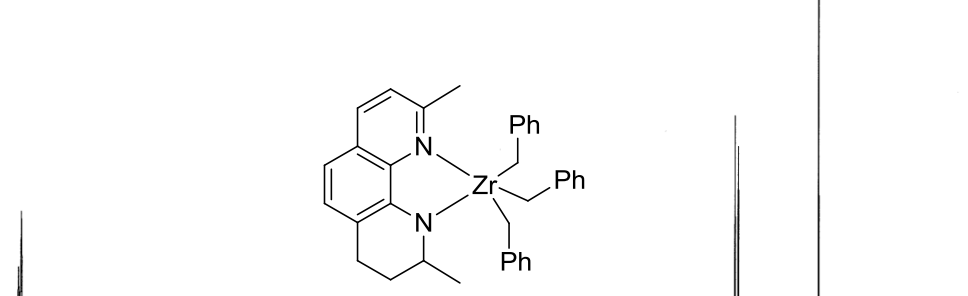
Cc1ccc2c(c1)nc(Cc3ccccc3)nc2Cc4ccccc4

[illegible]

< $^1\text{H}$  NMR spectrum of **19** in  $\text{C}_6\text{D}_6$ >

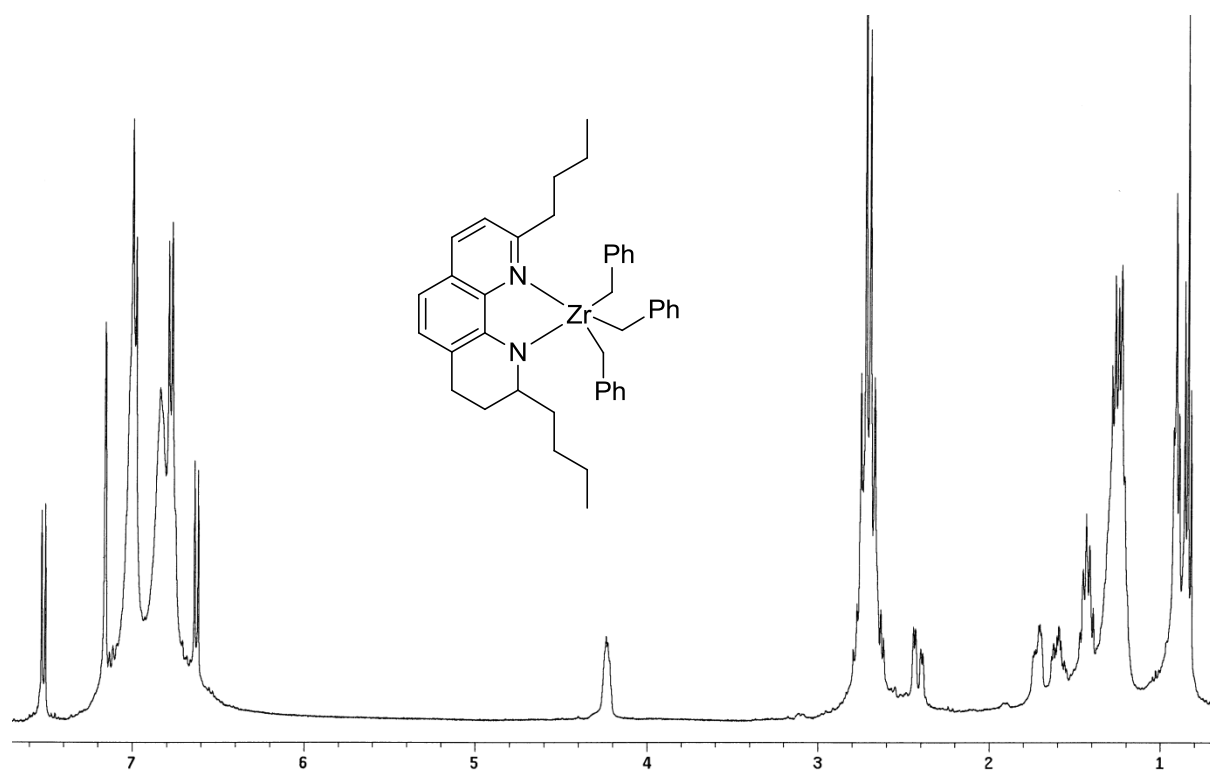

< $^{13}\text{C}$  NMR Spectrum of **19** in  $\text{C}_6\text{D}_6$ >

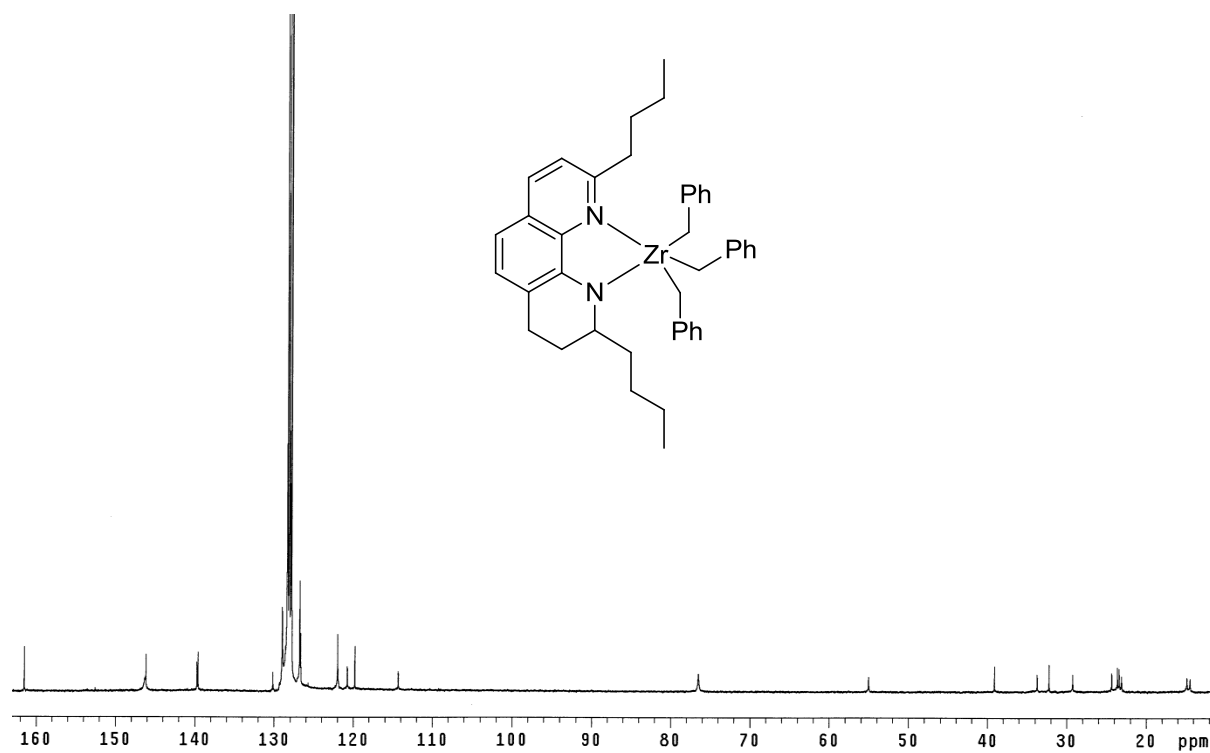

$^1\text{H}$  NMR spectrum of **20** in  $\text{C}_6\text{D}_6$

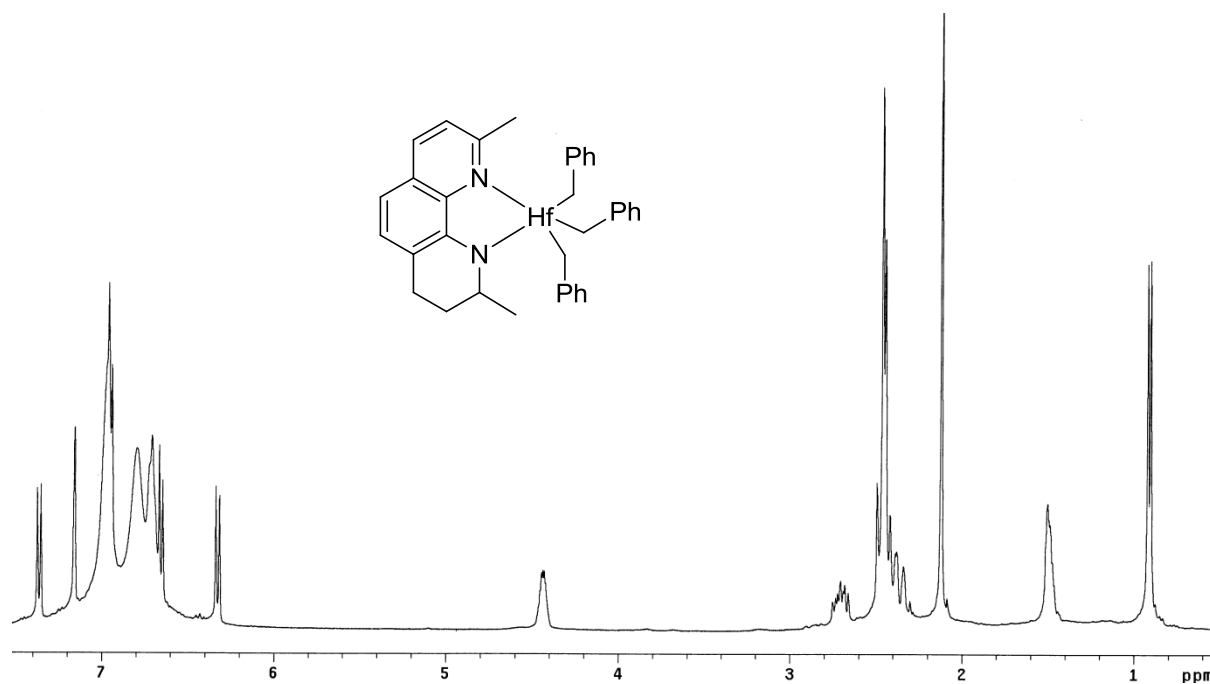

$^{13}\text{C}$  NMR spectrum of **20** in  $\text{C}_6\text{D}_6$

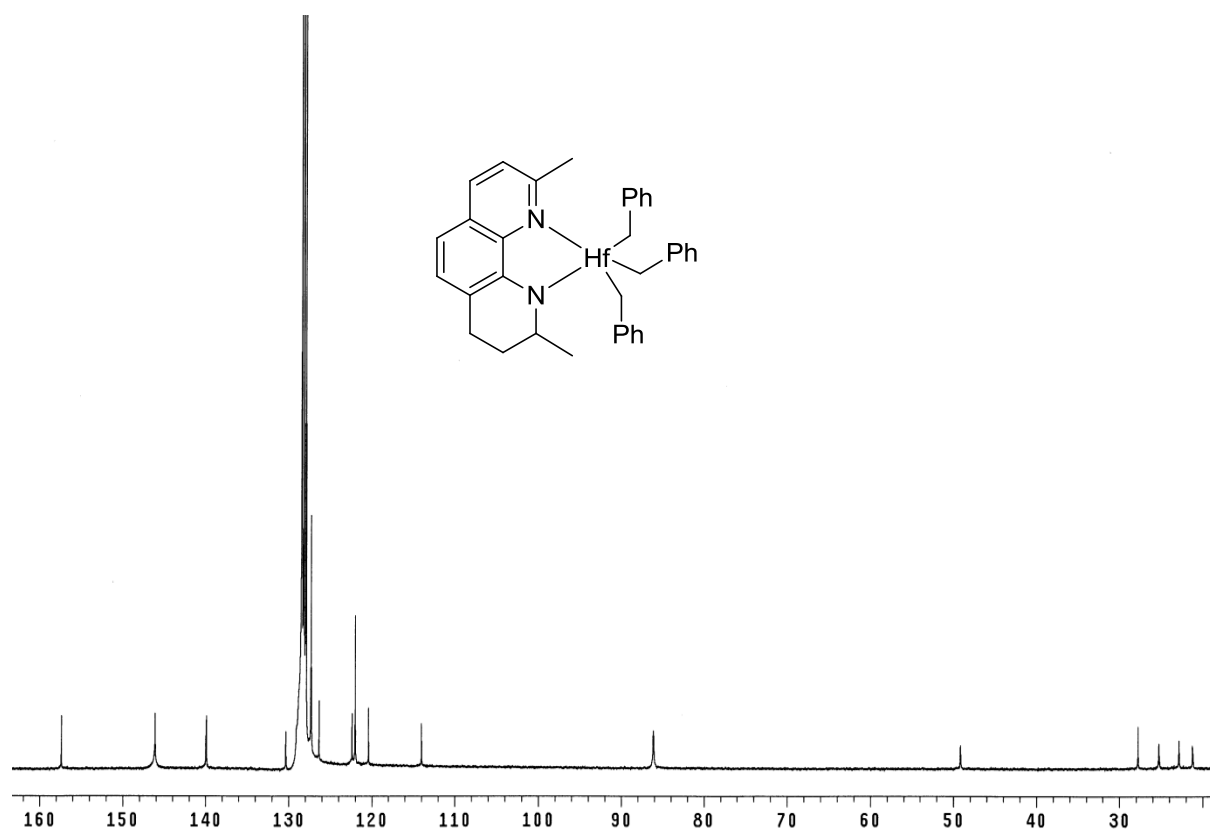

$^1\text{H}$  NMR spectrum of **21** in  $\text{C}_6\text{D}_6$

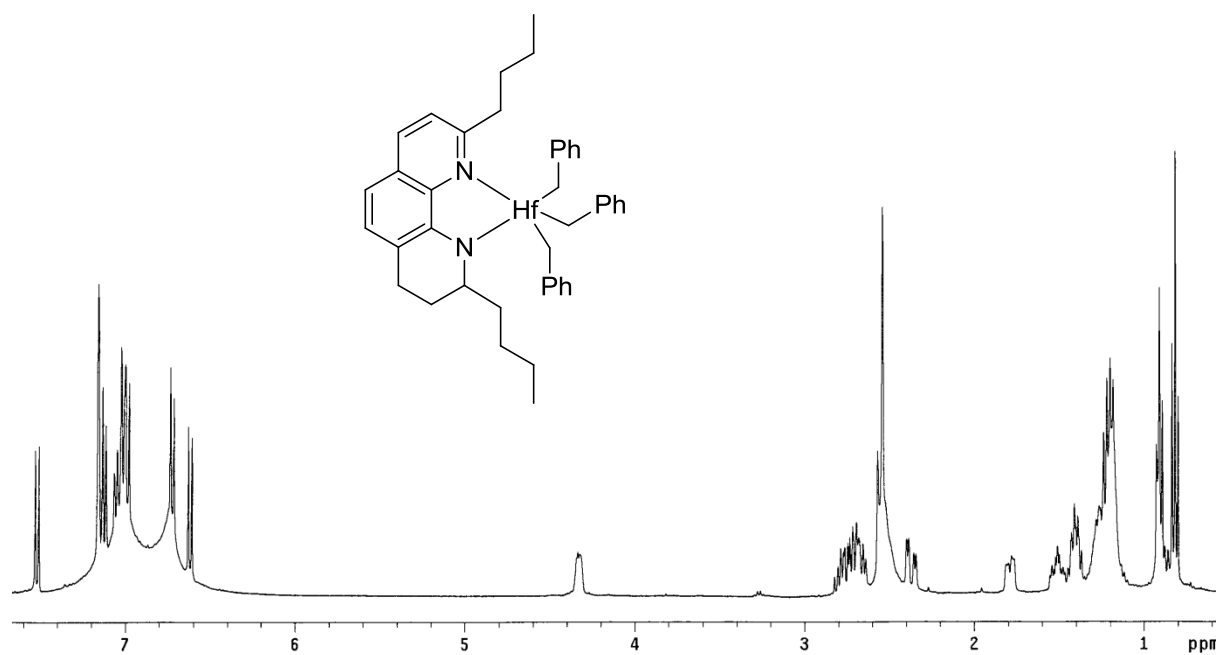

$^{13}\text{C}$  NMR spectrum of **21** in  $\text{C}_6\text{D}_6$

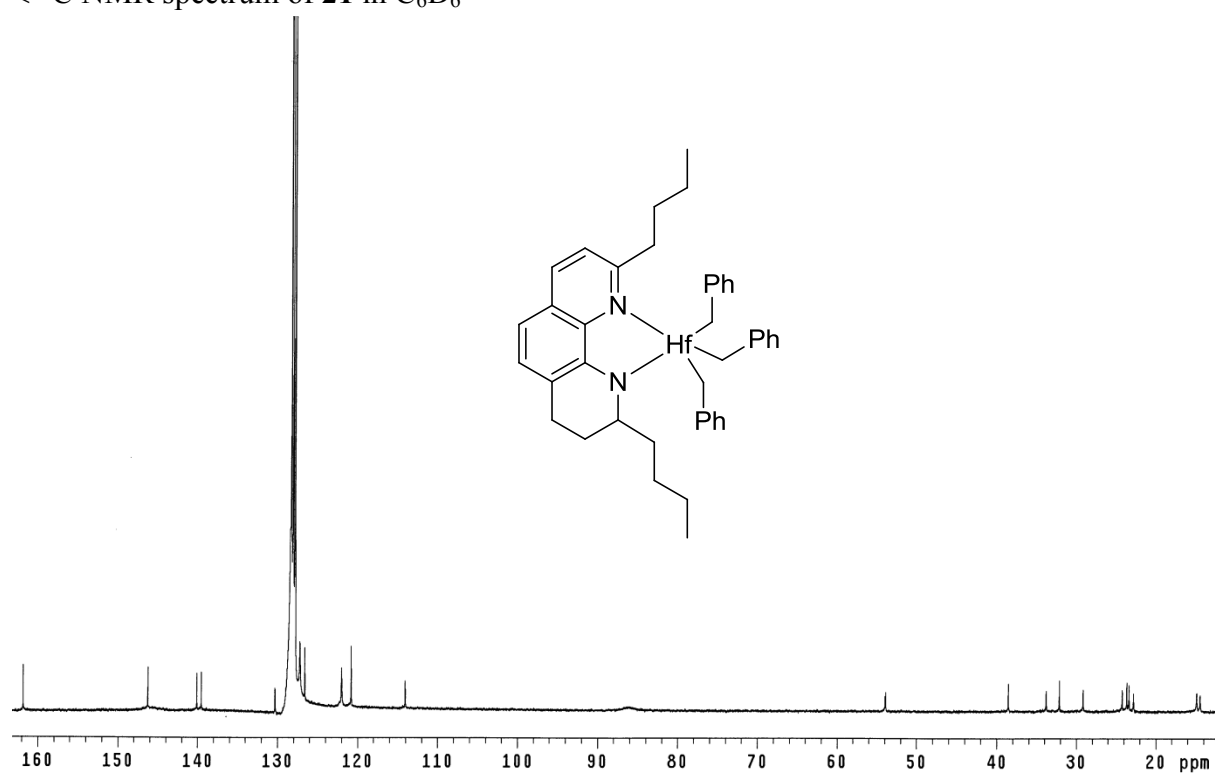

$^1\text{H}$  NMR spectrum of **22** in  $\text{C}_6\text{D}_6$

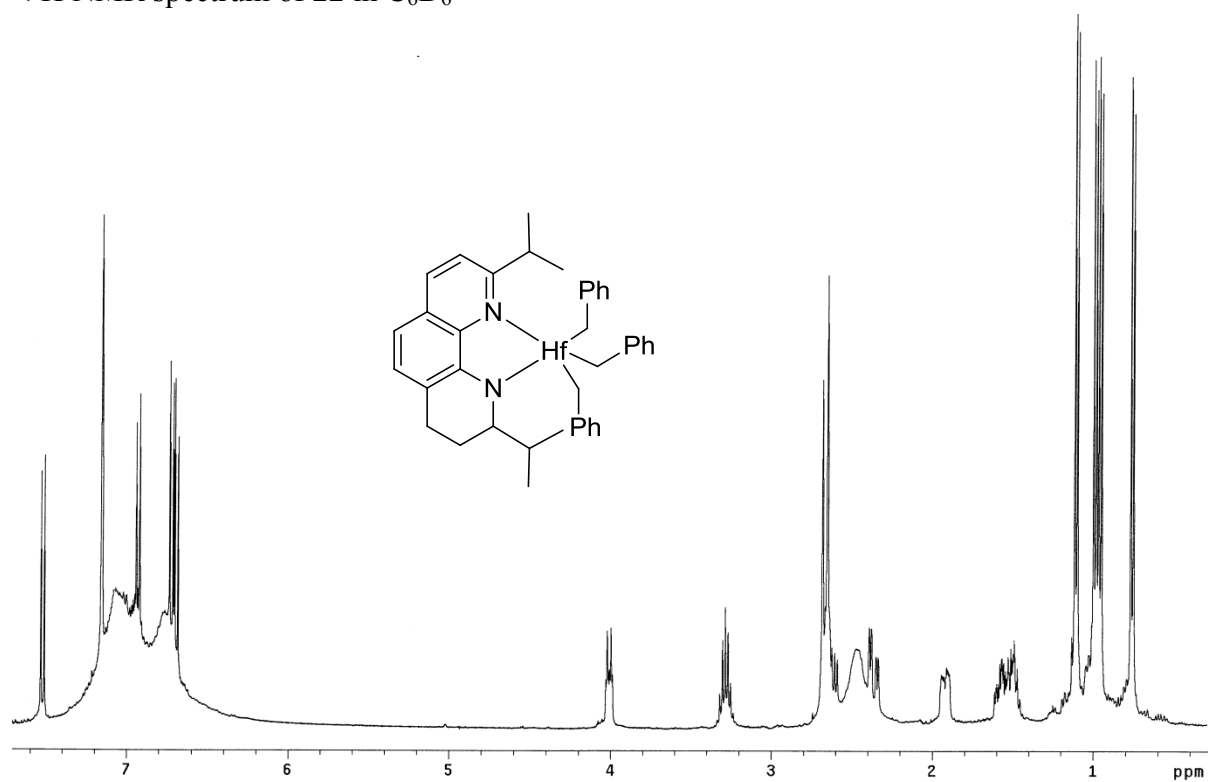

$^{13}\text{C}$  NMR spectrum of **22** in  $\text{C}_6\text{D}_6$

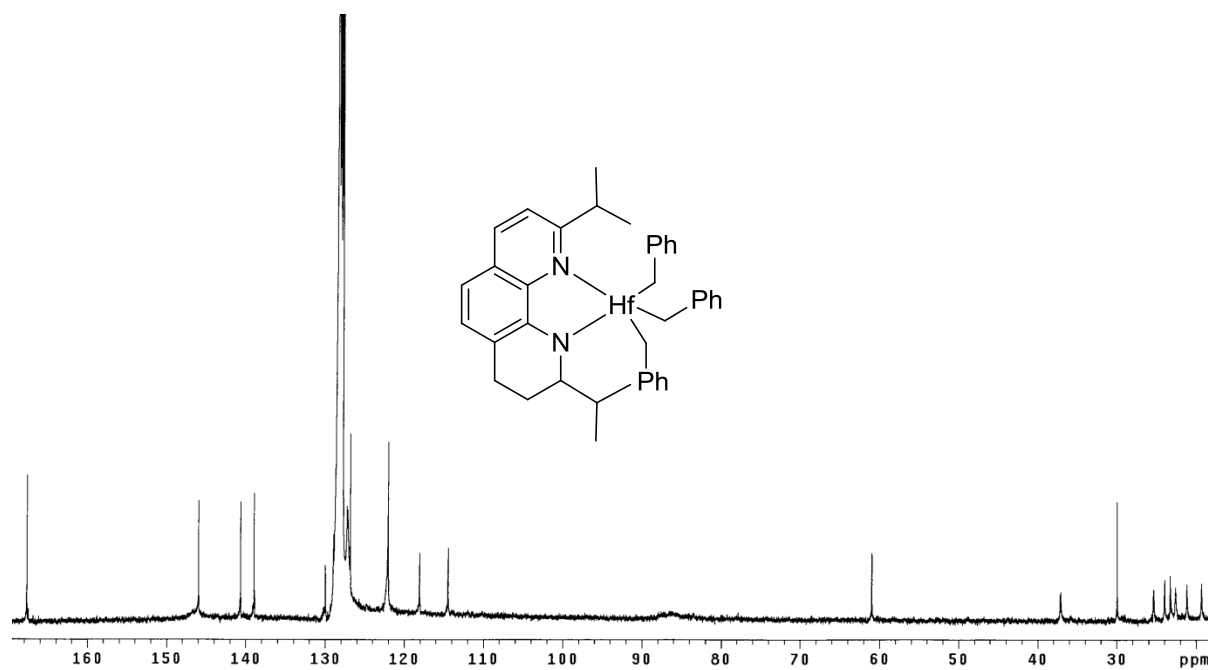

<Ethylene consumption rate versus time>

Polymerization conditions: **16** (1.5  $\mu\text{mol}$ ), MMAO (4.5 mmol), methylcyclohexane (40 mL), in the absence of 1-octene, 100 °C, ethylene (28–30 bar)

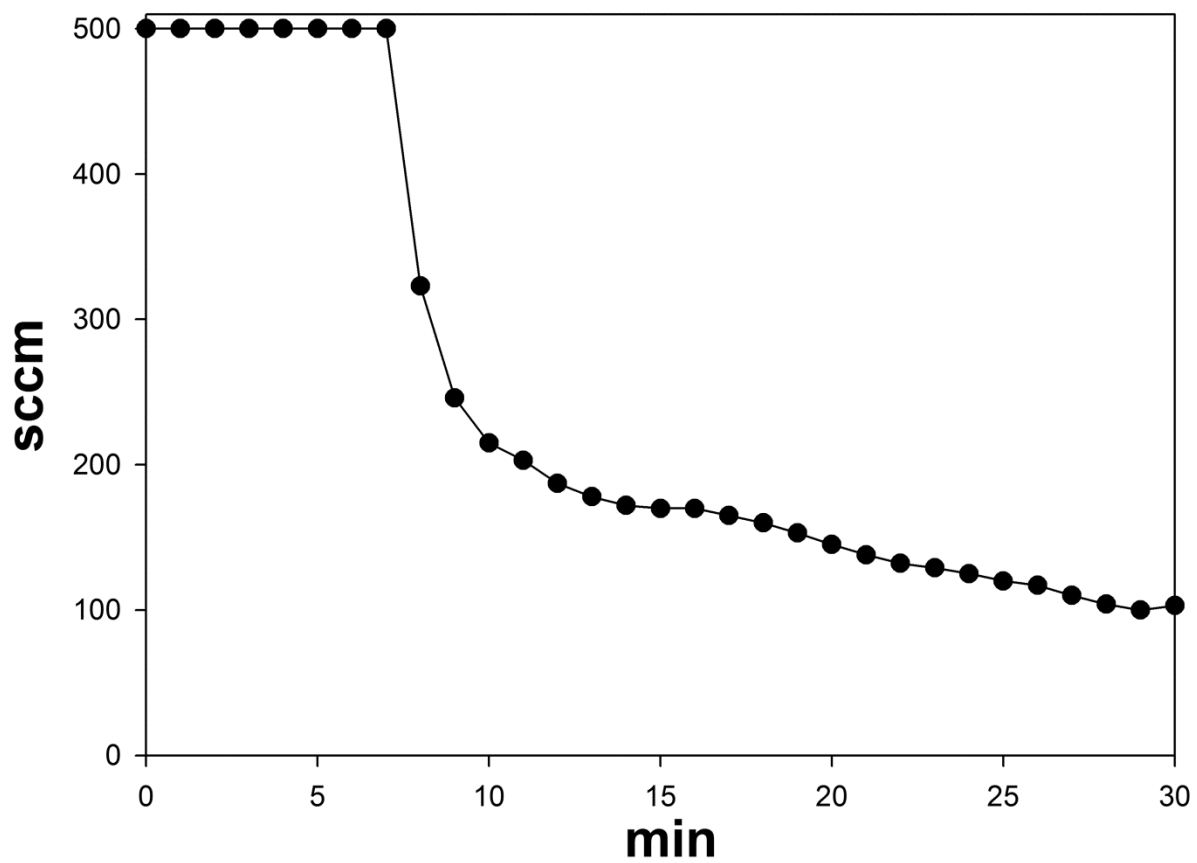

< DSC curve for the polymer generated with **4**>

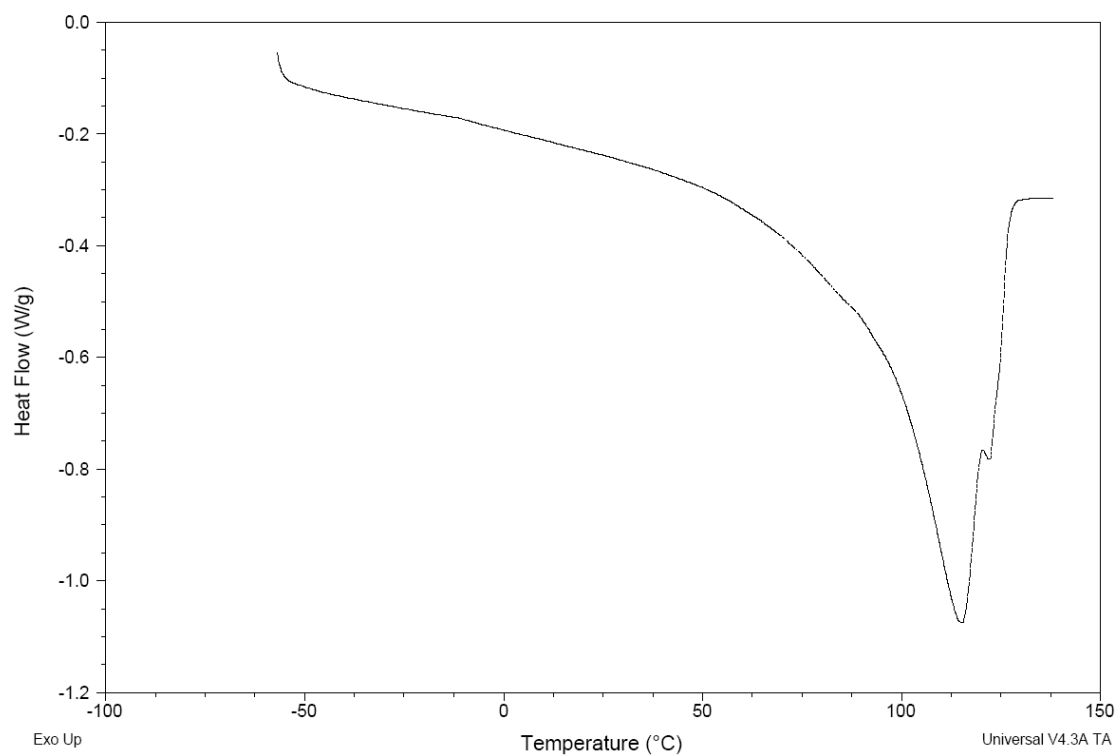

< DSC curve for the polymer generated with **5**>

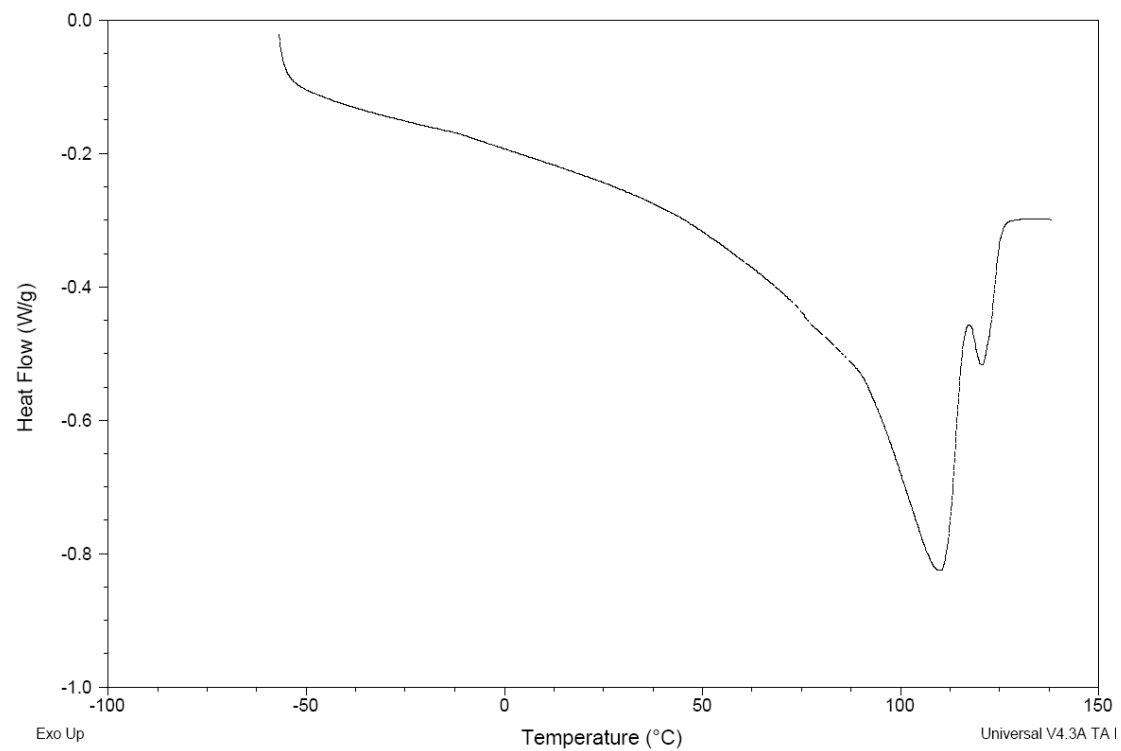



< DSC curve for the polymer generated with **6**>

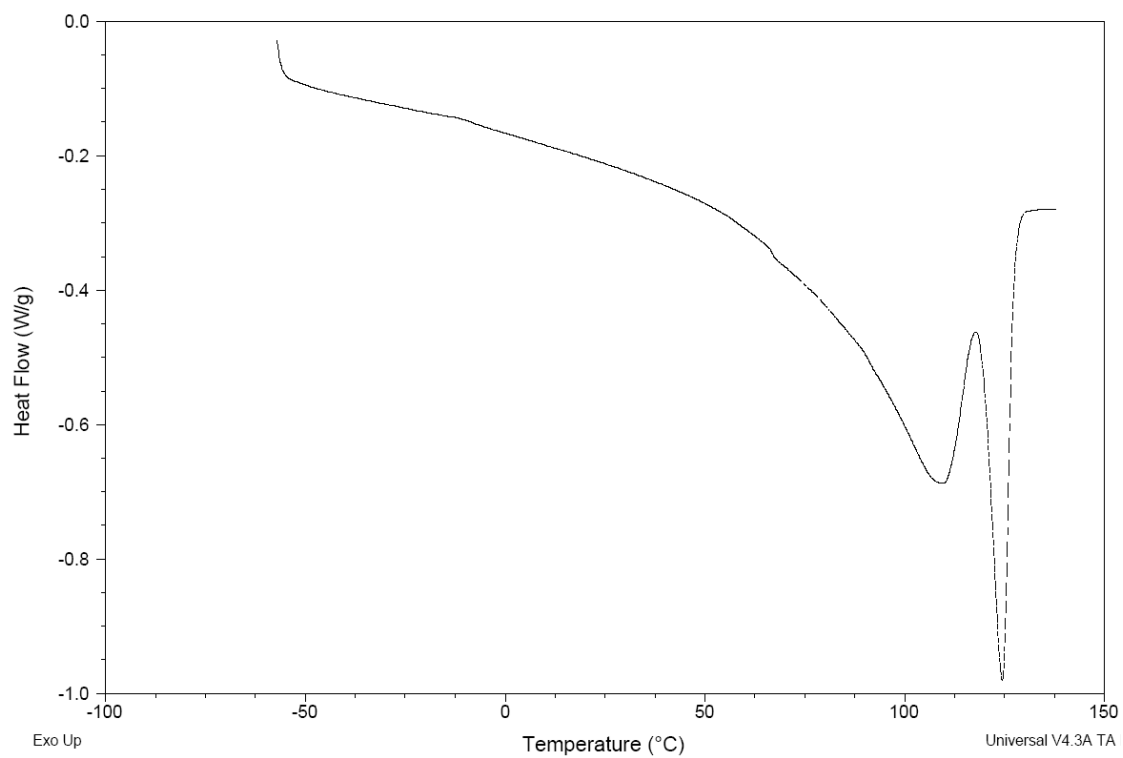

< DSC curve the polymer generated with **7**>

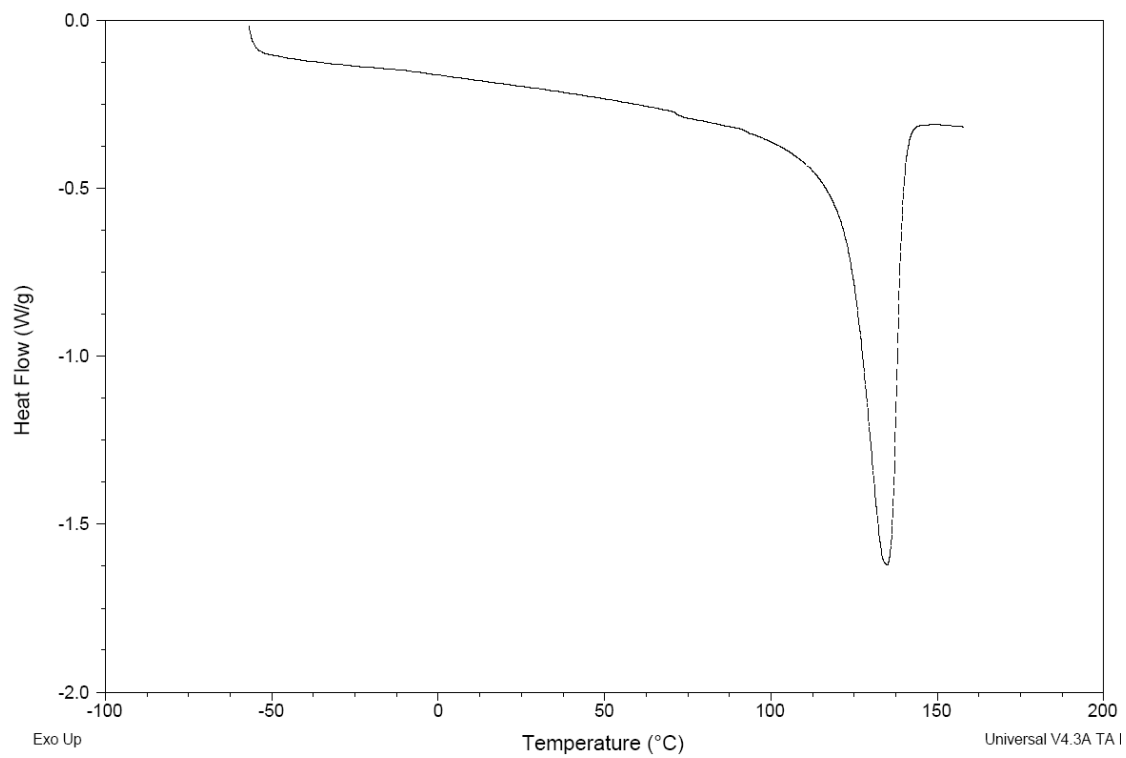

< DSC curve for the polymer generated with **12**>

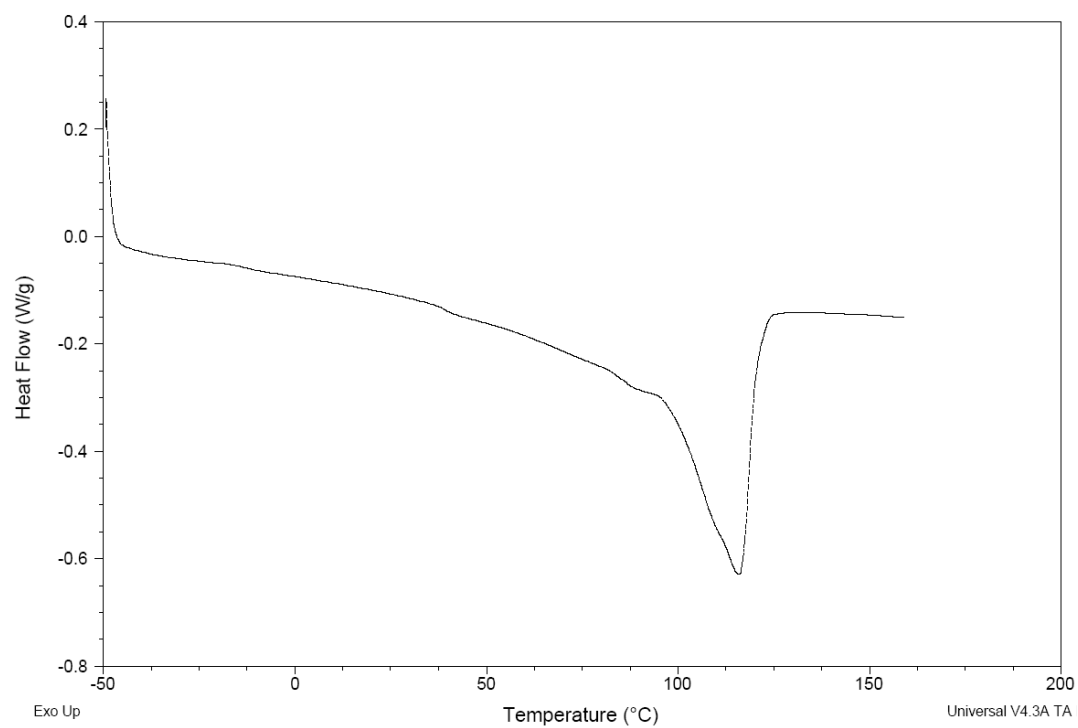

< DSC curve for the polymer generated with **13**>

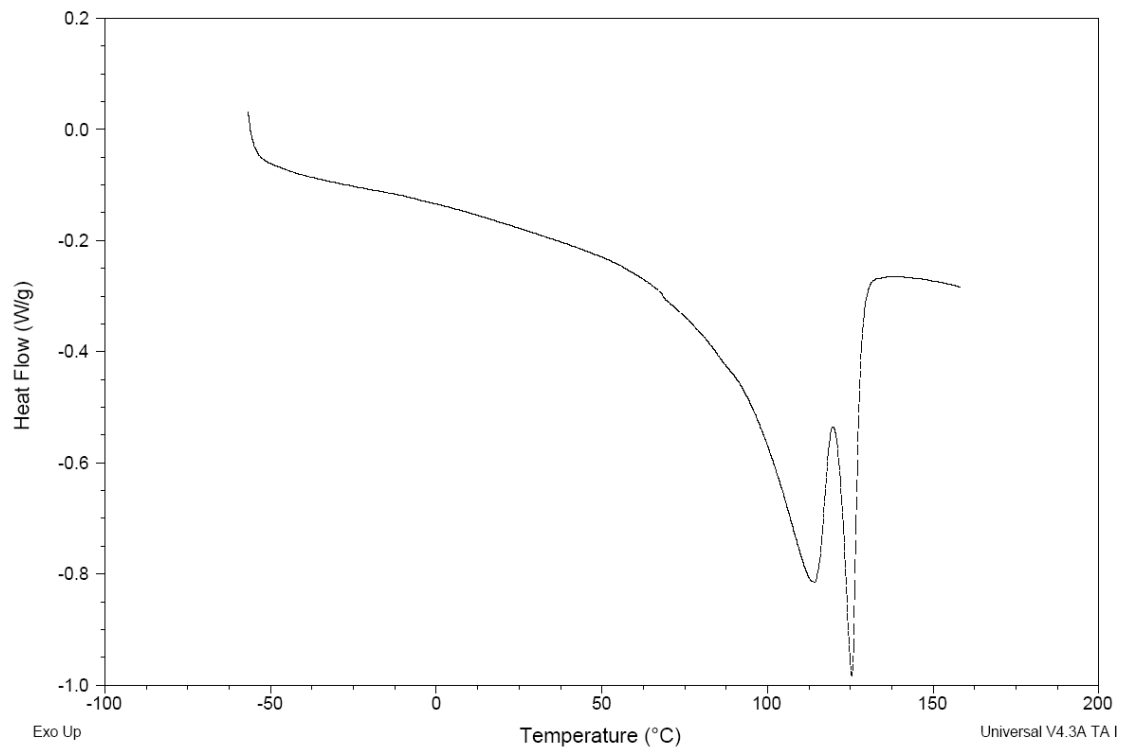

< DSC curve for the polymer generated with **14**>

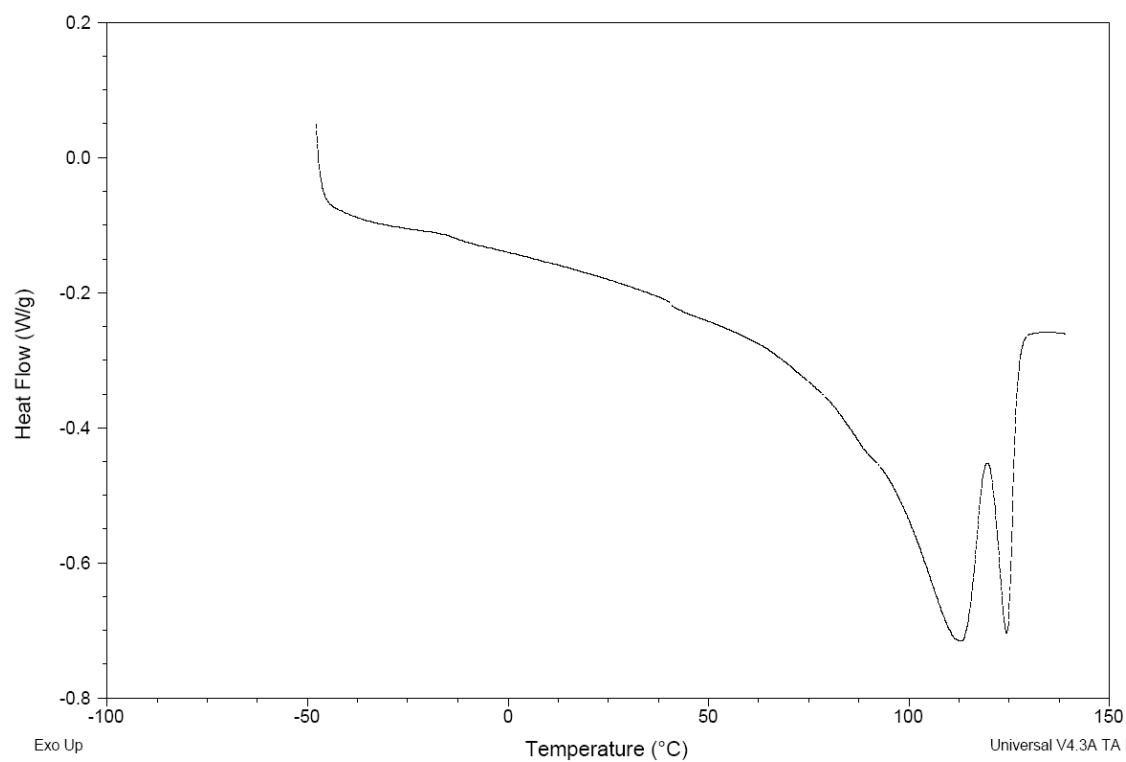

< DSC curve for the polymer generated with **15**>

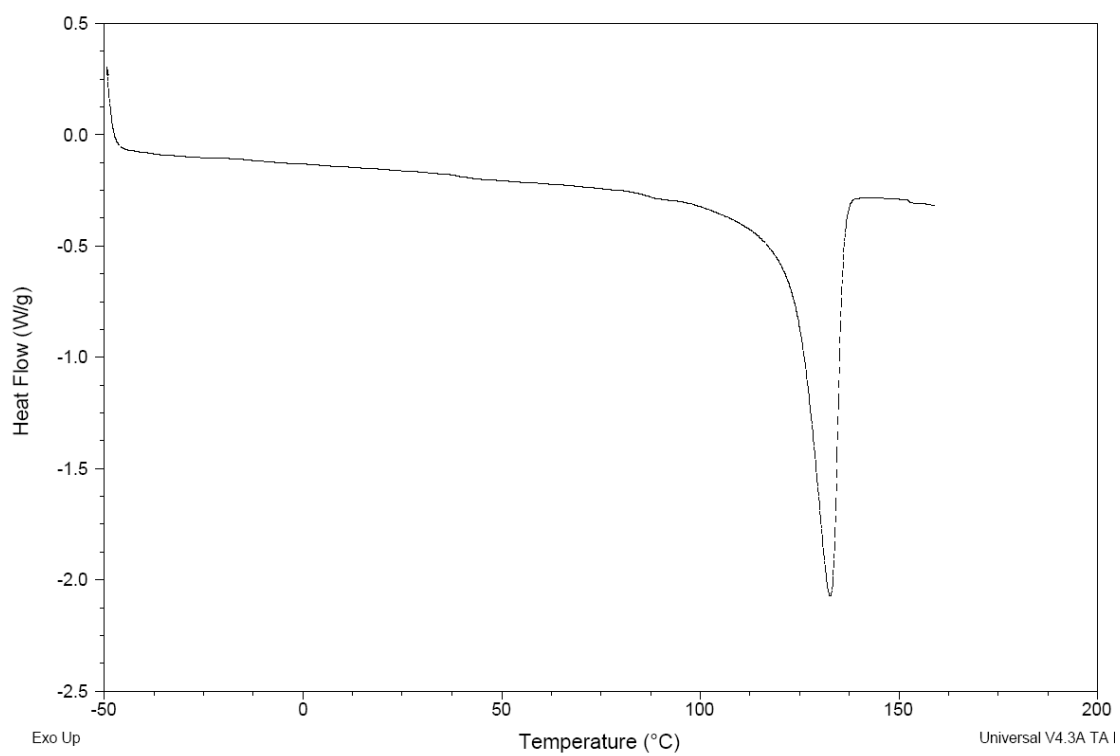

< DSC curve for the polymer generated with **16**>

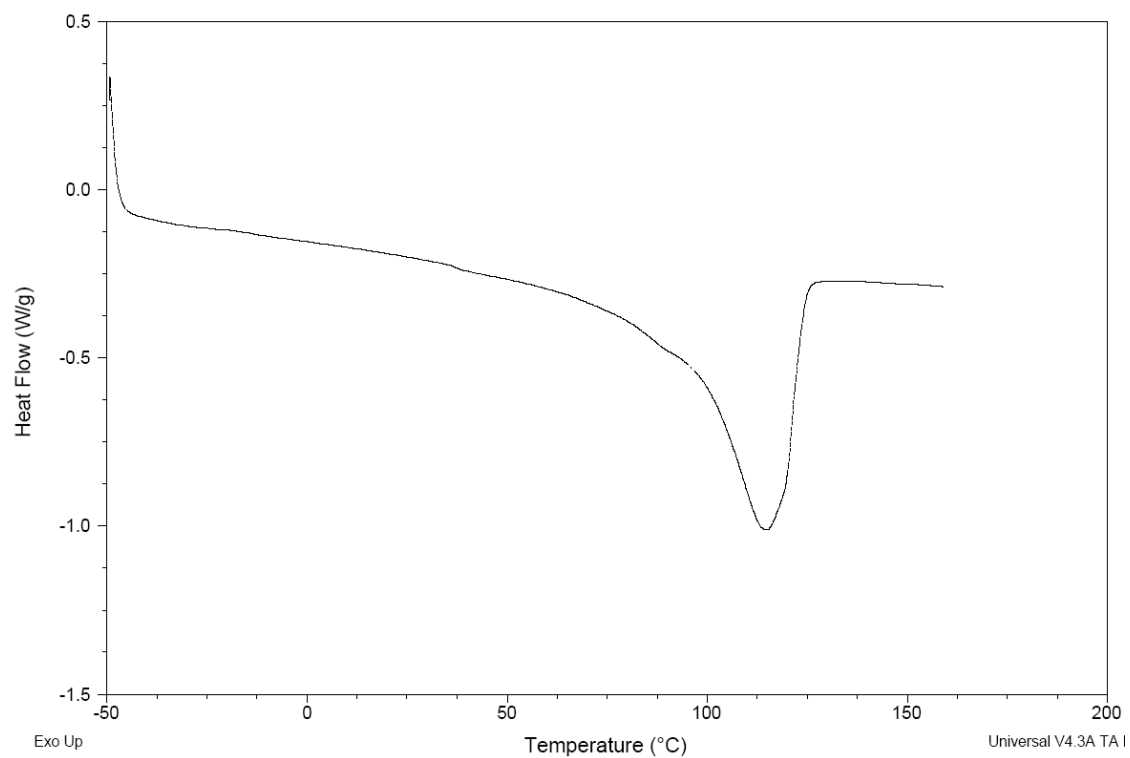

< DSC curve for the polymer generated with **17**>

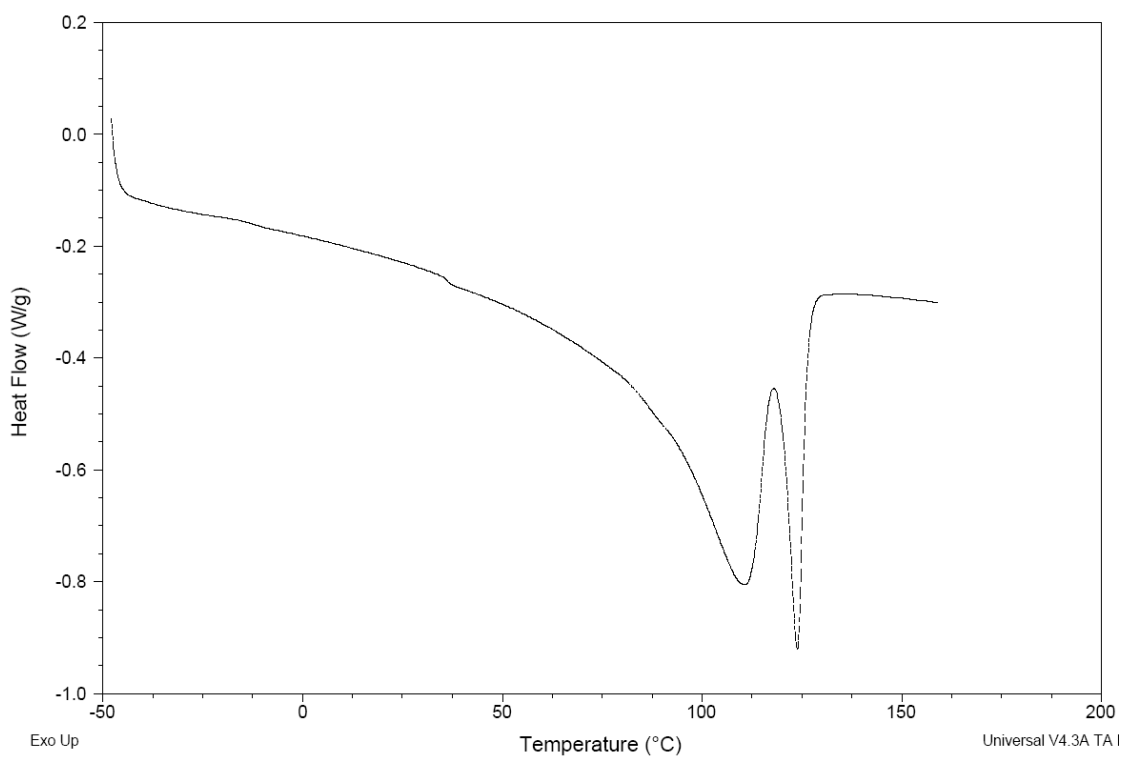

< DSC curve for the polymer generated with **18**>

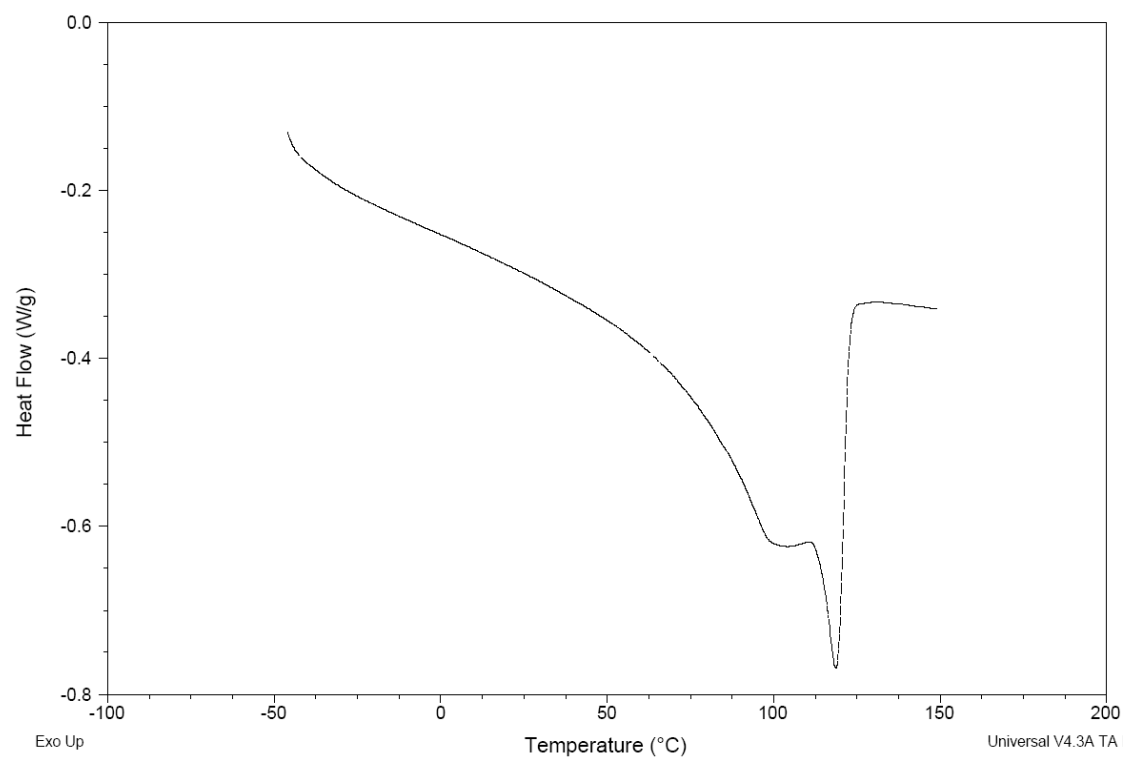

< DSC curve for the polymer generated with **19**>

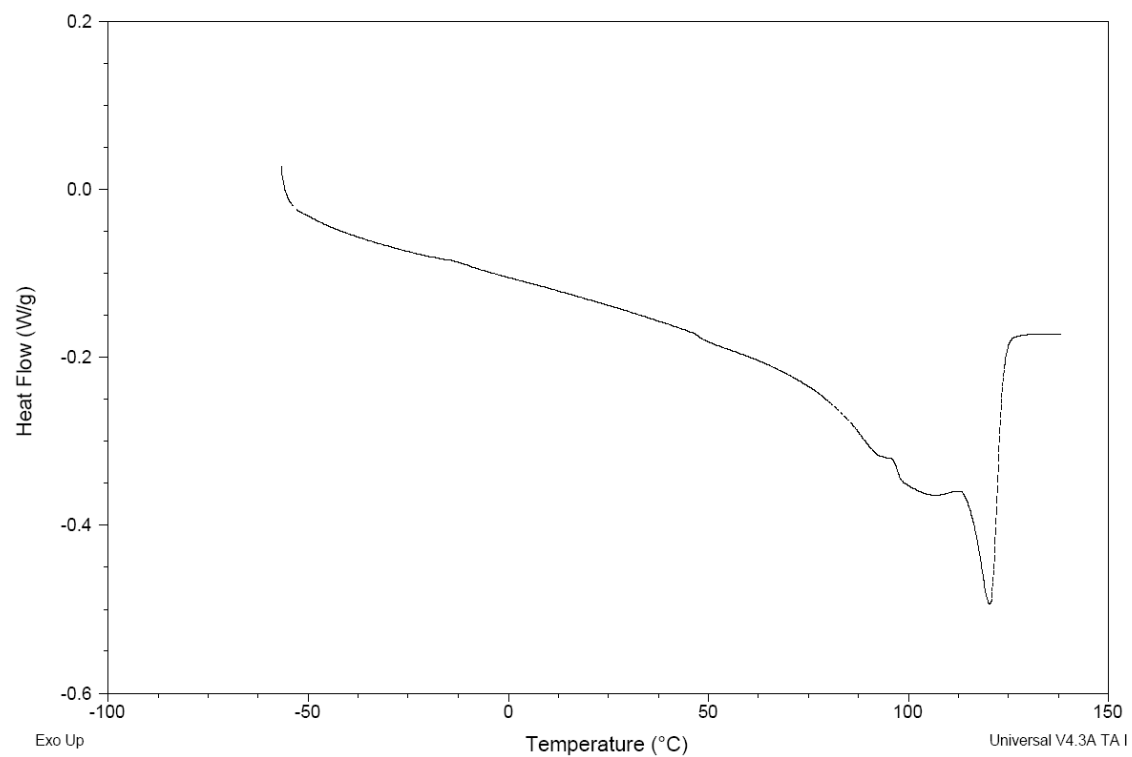

< DSC curve for the polymer generated with **20**>

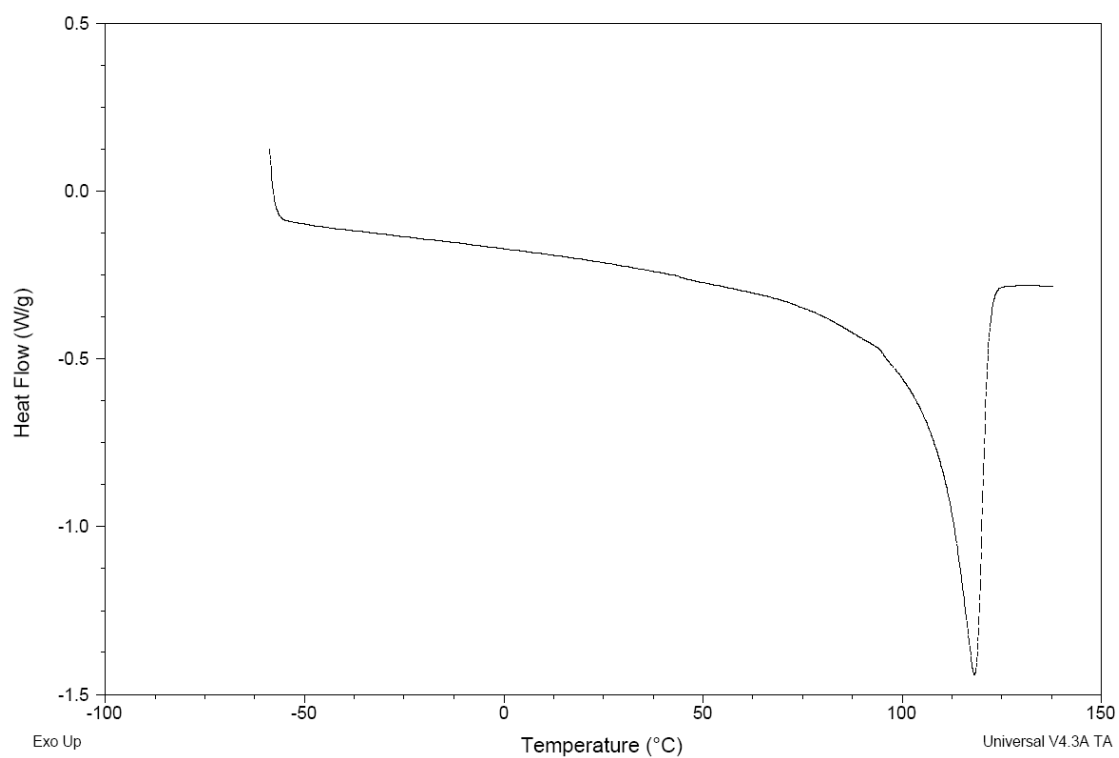

< DSC curve for the polymer generated with **21**>

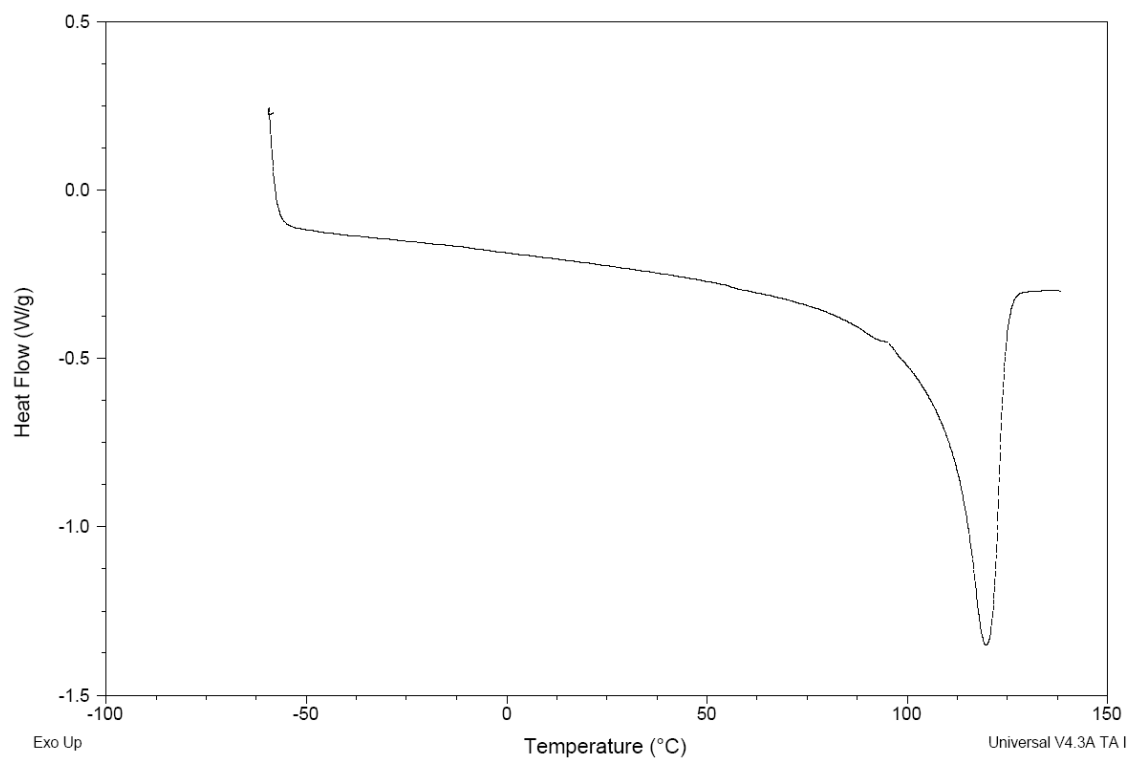

< DSC curve for the polymer generated with **22**>

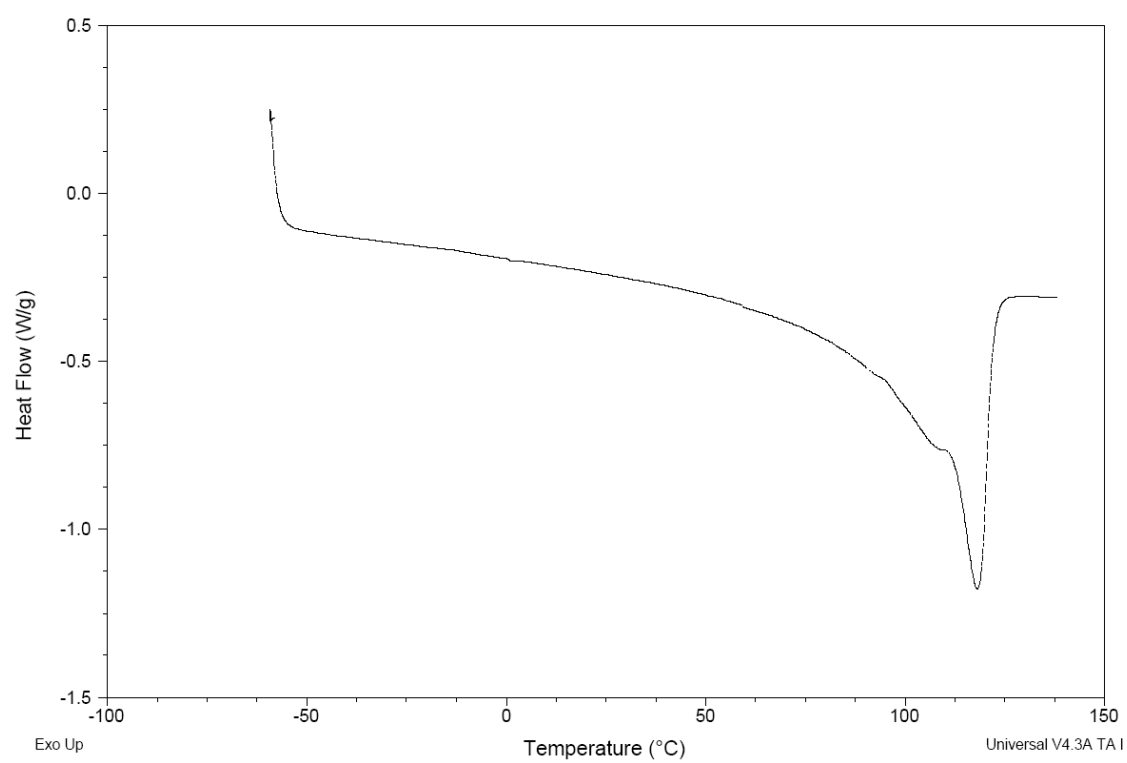

< GPC curve for the polymer generated with **12** (entry 6 in Table 1)>

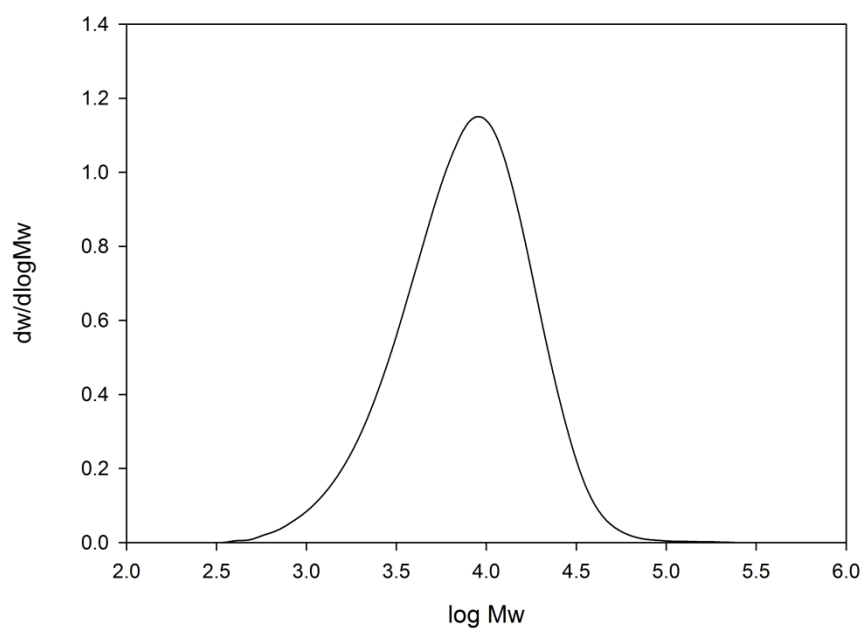

< GPC curve for the polymer generated with **13** (entry 7 in Table 1)>

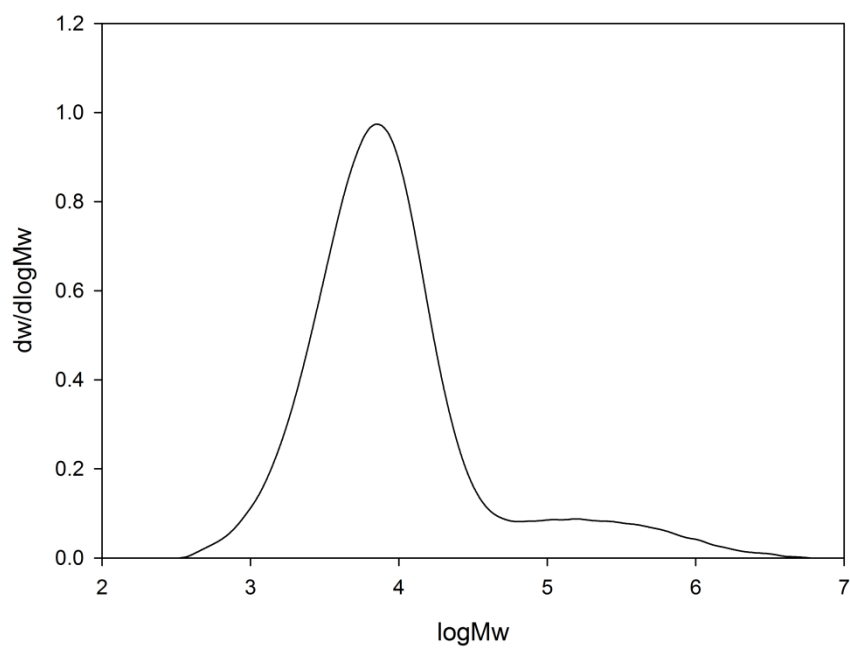



< GPC curve for the polymer generated with **16** (entry 10 in Table 1)>

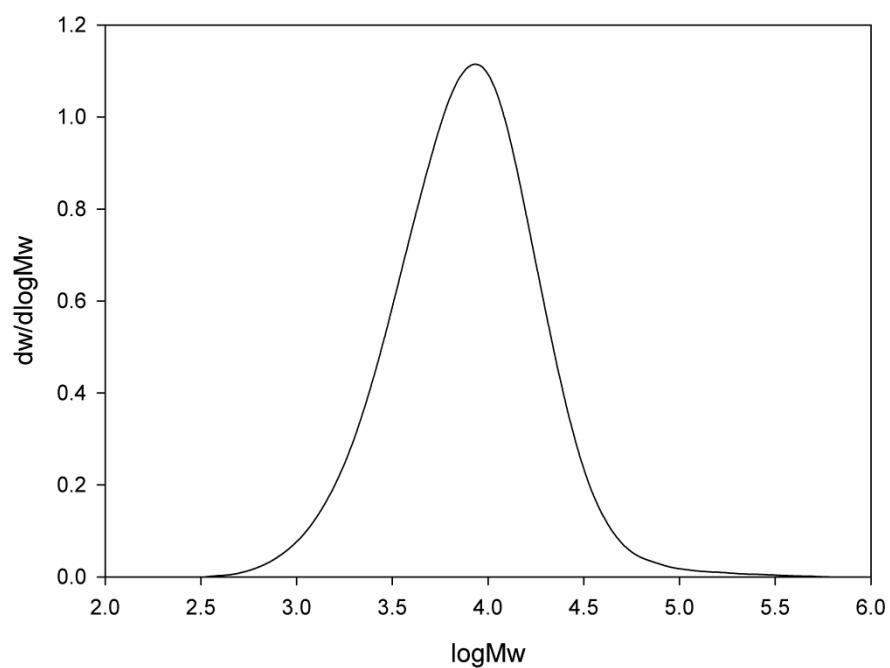

< GPC curve for the polymer generated with **17** (entry 11 in Table 1)>

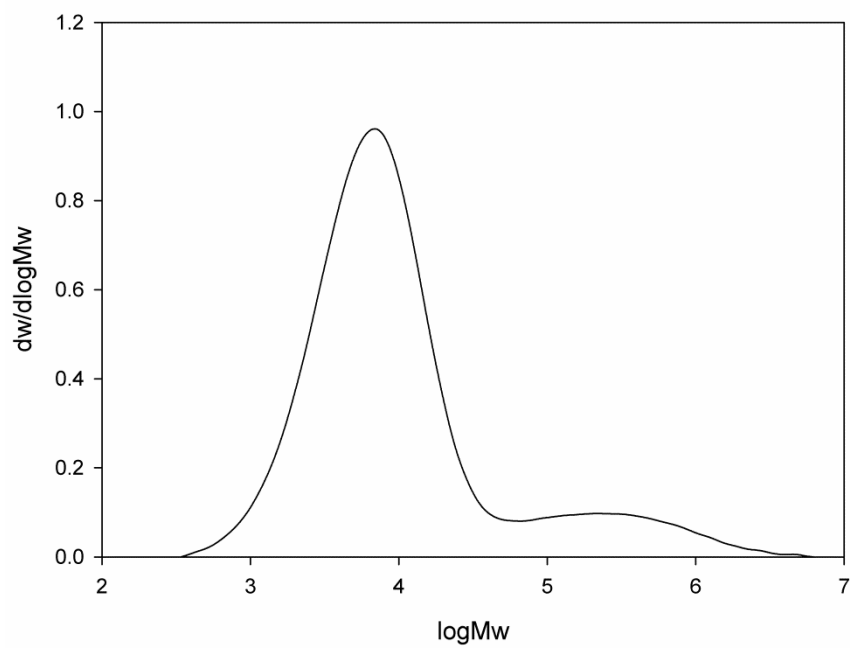

Supplement: c4dt03683b1.pdf [file c4dt03683b1.pdf]
